# Supplementary material
Source: PubMed Central journal article supplement (PMC11067784)
Supplement: NIHMS1987032-supplement-Supplementary_Tables.pdf [file NIHMS1987032-supplement-Supplementary_Tables.pdf]

# Dietary Fatty Acids and Colorectal Cancer Risk in Men: A Report from the Shanghai Men's Health Study and a Meta-Analysis

Sang Nguyen<sup>1</sup>, Honglan Li<sup>2</sup>, Danxia Yu<sup>1</sup>, Hui Cai<sup>1</sup>, Jing Gao<sup>3</sup>, Yutang Gao<sup>2</sup>, Hung Luu<sup>4</sup>, Huong Tran<sup>5</sup>, Yong-Bing Xiang<sup>2</sup>, Wei Zheng<sup>1</sup>, and Xiao-Ou Shu<sup>1</sup>

## Table of Contents

|                                                                                                                                                                                                          |    |
|----------------------------------------------------------------------------------------------------------------------------------------------------------------------------------------------------------|----|
| <b>Supplementary Materials and Methods</b> .....                                                                                                                                                         | 2  |
| Medical Subject Heading (MESH) search strategy.....                                                                                                                                                      | 2  |
| Prospective cohort studies on dietary fatty acid intake and CRC risk .....                                                                                                                               | 2  |
| <b>Supplementary Tables</b> .....                                                                                                                                                                        | 14 |
| <i>Supplementary Table 1.</i> HRs (95% CIs) for colorectal cancer by quartile of specific fatty acid intake.....                                                                                         | 14 |
| <i>Supplementary Table 2.</i> HRs (95% CIs) for colon cancer by quartile of major subtypes and specific fatty acid intakes.....                                                                          | 16 |
| <i>Supplementary Table 3.</i> HRs (95% CIs) for rectal cancer by quartile of major subtypes and specific fatty acid intakes.....                                                                         | 18 |
| <i>Supplementary Table 4:</i> Spearman rank correlation ( <i>r</i> ) between dietary fatty acid intake and food groups * .....                                                                           | 20 |
| <i>Supplementary Table 5.</i> Meta-analysis of the association between types of dietary fatty acid intakes (highest vs lowest intake) and the risk of CRC among men and women by cancer sites .....      | 22 |
| <i>Supplementary Table 6.</i> Meta-analysis of the association between types of dietary fatty acid intakes (highest vs lowest intake) and the risk of CRC among men and women by geographic region ..... | 24 |
| <b>Supplementary Figures</b> .....                                                                                                                                                                       | 26 |
| <i>Supplementary Figure 1:</i> Selection of studies for meta-analysis .....                                                                                                                              | 26 |
| <i>Supplementary Figure 2:</i> Meta-analysis of n-3 PUFA and n-6 PUFA intake and risk of CRC.....                                                                                                        | 27 |

## Supplementary Materials and Methods

### Medical Subject Heading (MESH) search strategy

#### Strategy: Terms 1 AND Terms 2 AND Terms 3

- **Terms 1:** Colorectal Neoplasms OR Colonic Neoplasms OR Rectal Neoplasms
- **Terms 2:** Fatty Acids OR Fatty Acids, Monounsaturated OR Fatty Acids, Unsaturated OR Fatty Acids, Omega-6 OR Fatty Acids, Omega-3 OR Dietary Fats OR Dietary Fats, Unsaturated
- **Terms 3:** Cohort Studies OR Prospective Studies OR Case-Control Studies OR Follow-Up Studies

#### Search on PubMed database:

((("Colorectal Neoplasms"[Mesh]) OR "Colonic Neoplasms" [Mesh]) OR "Rectal Neoplasms"[Mesh]) AND (((((((("Fatty Acids"[Mesh]) OR "Fatty Acids, Monounsaturated"[Mesh]) OR "Fatty Acids, Unsaturated"[Mesh]) OR "Fatty Acids, Omega-6"[Mesh]) OR "Fatty Acids, Omega-3"[Mesh]) OR "Dietary Fats"[Mesh]) OR "Dietary Fats, Unsaturated"[Mesh]) AND (((("Cohort Studies"[Mesh]) OR "Prospective Studies"[Mesh]) OR "Case-Control Studies"[Mesh]) OR "Follow-Up Studies"[Mesh]))

### Prospective cohort studies on dietary fatty acid intake and CRC risk

| Author (year); Ethnicity (Country) (No. of reference) | Cohort study; Follow-up (median years)              | Sex   | Types | Cases | Participants | Fatty acids              | Adjusted RR or HR (95% CI) (highest vs lowest intake)                      | Adjustment for confounding                                 |
|-------------------------------------------------------|-----------------------------------------------------|-------|-------|-------|--------------|--------------------------|----------------------------------------------------------------------------|------------------------------------------------------------|
| Stemmermann (1984); Japanese (U.S.A) <sup>14</sup>    | Japan-Hawaii cancer Study; 1965-1983 (Average 15.0) | Men   | CC    | 106   | 7074         | SFA                      | 0.49 (0.27-0.91)                                                           | Age at time of examination.                                |
|                                                       |                                                     |       | RC    | 59    | 7074         | SFA                      | 1.51 (0.65-3.54)                                                           | Age at time of examination and ethanol intake (g per day). |
| Willett (1990); Caucasian (U.S.A) <sup>7</sup>        | Nurses' Health Study Cohort; 1980-1986 (NA)         | Women | CC    | 150   | 88751        | TFA<br>SFA<br>MUFA<br>LA | 2.0 (1.1-3.63)<br>1.39 (0.83-2.33)<br>1.72 (1.01-2.93)<br>0.93 (0.55-1.58) | Age and total energy.                                      |
|                                                       |                                                     |       | CC    | 212   | 35216        | TFA<br>SFA               | 0.86 (0.54-1.33)<br>1.21 (0.78-1.89)                                       | Age, total energy intake, height, parity, total vitamin    |

|                                                           |                                                                                               |                |     |     |       |                                                                               |                                                                                                                                    |                                                                                                                                                  |
|-----------------------------------------------------------|-----------------------------------------------------------------------------------------------|----------------|-----|-----|-------|-------------------------------------------------------------------------------|------------------------------------------------------------------------------------------------------------------------------------|--------------------------------------------------------------------------------------------------------------------------------------------------|
| Bostick (1994);<br>Caucasian<br>(U.S.A) <sup>15</sup>     | IoWa Women's<br>Health Study; 1986-<br>1990 (NA)                                              |                |     |     |       | MUFA<br>PUFA<br>Total n-3 PUFA                                                | 0.85 (0.54-1.35)<br>0.74 (0.49-1.12)<br>0.7 (0.45-1.09)                                                                            | E intake, a total vitamin E by<br>age interaction term, and<br>Vitamin A supplement<br>intake.                                                   |
| Giovannucci<br>(1994); Caucasian<br>(U.S.A) <sup>16</sup> | Health Professionals<br>Follow-up Study<br>Cohort; 1986-1992<br>(NA)                          | Men            | CC  | 205 | 47949 | TFA<br>SFA<br>MUFA<br>LA                                                      | 1.19 (0.74-1.9)<br>0.88 (0.56-1.37)<br>1.07 (0.68-1.69)<br>0.79 (0.51-1.22)                                                        | Age and total energy intake<br>using residual method                                                                                             |
| Chyou (1996);<br>Japanese (U.S.A) <sup>18</sup>           | Hawaii Tumor<br>Registry; 1965-1995<br>(NA)                                                   | Men            | CC  | 330 | 7954  | TFA<br>MUFA                                                                   | 0.67 (0.5-0.9)<br>0.73 (0.53-1.0)                                                                                                  | Age                                                                                                                                              |
|                                                           |                                                                                               |                | RC  | 123 | 7954  | TFA<br>MUFA                                                                   | 1.07 (0.61-1.86)<br>1.47 (0.88-2.47)                                                                                               |                                                                                                                                                  |
| Gaard (1996);<br>Caucasian<br>(Norway) <sup>19</sup>      | Norwegian Cancer<br>Registry; 1977-1991<br>(Average 11.4)                                     | Men &<br>Women | CC  | 143 | 50535 | TFA<br>SFA<br>MUFA                                                            | 1.02 (0.57-1.81)<br>1.33 (0.82-2.14)<br>0.84 (0.5-1.41)                                                                            | Age                                                                                                                                              |
| Kato (1997);<br>Caucasian<br>(U.S.A) <sup>20</sup>        | New York Women's<br>Health Study; 1985-<br>1994 (Median 7.1)                                  | Women          | CRC | 100 | 14727 | TFA<br>SFA                                                                    | 1.05 (0.6-1.84)<br>1.05 (0.59-1.88)                                                                                                | Age, total energy intake,<br>place at enrolment, and<br>educational levels                                                                       |
| Pietinen (1999);<br>Caucasian<br>(Finland) <sup>21</sup>  | Alpha-Tocophenol,<br>Beta-carotene cancer<br>Prevention Study<br>(ATBC); 1995<br>(Median 8.0) | Men            | CRC | 185 | 27111 | TFA<br>SFA<br>MUFA<br>PUFA<br>Trans fatty acid<br>LA<br>ALA<br>Total n-3 PUFA | 0.9 (0.6-1.3)<br>0.9 (0.6-1.4)<br>1.2 (0.8-1.8)<br>1.4 (0.9-2.1)<br>1.1 (0.7-1.6)<br>1.3 (0.8-2)<br>1.4 (0.9-2.1)<br>1.2 (0.8-1.9) | Age, supplement group,<br>smoking years, body mass<br>index, alcohol, education,<br>physical activity at work,<br>and calcium intake.            |
| Jarvinen (2001);<br>Caucasian<br>(Finland) <sup>22</sup>  | Finnish Mobile<br>Clinic Health<br>Examination Survey;<br>1967-1999 (NA)                      | Men &<br>Women | CRC | 109 | 9959  | TFA<br>SFA<br>MUFA<br>PUFA                                                    | 1.47 (0.52-4.2)<br>1.47 (0.56-3.83)<br>2.37 (0.86-6.51)<br>1.13 (0.56-2.26)                                                        | Age, sex, body mass index,<br>occupation, smoking,<br>geographical area, energy<br>intake, and consumption of<br>vegetables, fruit, and cereals. |
|                                                           |                                                                                               |                | CC  | 63  | 9959  | TFA<br>SFA<br>MUFA<br>PUFA                                                    | 1.86 (0.46-7.43)<br>1.56 (0.44-5.48)<br>2.37 (0.61-9.19)<br>0.97 (0.38-2.46)                                                       |                                                                                                                                                  |
|                                                           |                                                                                               |                | RC  | 46  | 9959  | TFA<br>SFA<br>MUFA<br>PUFA                                                    | 1.09 (0.22-5.41)<br>1.39 (0.31-6.14)<br>2.38 (0.52-10.85)<br>1.35 (0.47-3.89)                                                      |                                                                                                                                                  |
| Terry (2001);<br>Caucasian<br>(Sweden) <sup>23</sup>      | 1987-1998 (MA)                                                                                | Women          | CRC | 460 | 61463 | SFA<br>LA<br>ALA<br>EPA<br>DHA                                                | 1.08 (0.8-1.47)<br>1.06 (0.78-1.45)<br>0.99 (0.75-1.32)<br>0.96 (0.72-1.28)<br>0.9 (0.67-1.2)                                      | Age, body mass index,<br>educational level, energy<br>intake, intakes of red meat<br>and alcohol, energy, dietary<br>fiber, calcium, Vitamin C,  |

|                                                           |                                                        |       |     |     |       |                                                                                                                                                                                                                                            |                                                                                                                                                                                                                                                                                                                                                                                                      |                                                                                                                                                                                                                                           |
|-----------------------------------------------------------|--------------------------------------------------------|-------|-----|-----|-------|--------------------------------------------------------------------------------------------------------------------------------------------------------------------------------------------------------------------------------------------|------------------------------------------------------------------------------------------------------------------------------------------------------------------------------------------------------------------------------------------------------------------------------------------------------------------------------------------------------------------------------------------------------|-------------------------------------------------------------------------------------------------------------------------------------------------------------------------------------------------------------------------------------------|
|                                                           |                                                        |       | CC  | 291 | 61463 | LA<br>ALA<br>EPA<br>DHA                                                                                                                                                                                                                    | 0.88 (0.61-1.3)<br>0.9 (0.63-1.28)<br>0.85 (0.6-1.21)<br>0.88 (0.61-1.26)                                                                                                                                                                                                                                                                                                                            | folic acid, and vitamin D. Saturated fat, monounsaturated fat, and polyunsaturated fat were included in the same model.                                                                                                                   |
|                                                           |                                                        |       | RC  | 159 | 61463 | LA<br>ALA<br>EPA<br>DHA                                                                                                                                                                                                                    | 1.53 (0.87-2.69)<br>1.11 (0.7-1.78)<br>1.25 (0.75-2.06)<br>1.03 (0.62-1.71)                                                                                                                                                                                                                                                                                                                          |                                                                                                                                                                                                                                           |
| Flood (2003);<br>88.8% Caucasian<br>(U.S.A) <sup>24</sup> | BCDDP; 1989-1998<br>(Median 8.5)                       | Women | CRC | 487 | 45496 | TFA<br>SFA<br>UFA                                                                                                                                                                                                                          | 1.14 (0.86-1.53)<br>1.02 (0.77-1.34)<br>1.07 (0.82-1.41)                                                                                                                                                                                                                                                                                                                                             | Energy using multivariate nutrient density method and controlling total fat.                                                                                                                                                              |
| Brink (2004);<br>Caucasian<br>(Netherlands) <sup>25</sup> | Netherlands Cohort<br>Study; 1989-1994<br>(Median 5.0) | M&F   | CC  | 448 | 2948  | TFA<br>SFA<br>MUFA<br>PUFA<br>ALA<br>LA                                                                                                                                                                                                    | 0.95 (0.71-1.27)<br>0.93 (0.69-1.26)<br>0.98 (0.73-1.33)<br>1.21 (0.89-1.64)<br>1.01 (0.75-1.36)<br>1.31 (0.97-1.77)                                                                                                                                                                                                                                                                                 | Age, sex, Quetelet Index, smoking, energy intake (using residual method) and family history of CRC.                                                                                                                                       |
|                                                           |                                                        |       | RC  | 160 | 2948  | TFA<br>SFA<br>MUFA<br>PUFA<br>ALA<br>LA                                                                                                                                                                                                    | 0.86 (0.55-1.36)<br>0.73 (0.46-1.17)<br>0.87 (0.56-1.37)<br>0.83 (0.53-1.29)<br>0.91 (0.58-1.44)<br>1.03 (0.66-1.62)                                                                                                                                                                                                                                                                                 |                                                                                                                                                                                                                                           |
| Lin (2004);<br>Caucasian (U.S.A)<br><sup>26</sup>         | Women's Health<br>Study; 1993-2003<br>(Median 8.7)     | Women | CRC | 202 | 37547 | TFA<br>SFA<br>MUFA<br>Total n-6 PUFA<br>Total n-3 PUFA<br>Trans fatty acid<br>FA4:0<br>FA6:0 – FA 10:0<br>FA12:0 - FA14:0<br>FA16:0<br>FA18:0<br>FA16:1<br>FA18:1<br>FA20:1<br>LA<br>FA20:4<br>EPA<br>DHA<br>Trans FA 16:1<br>Trans FA18:1 | 1 (0.63-1.58)<br>0.92 (0.61-1.41)<br>1.09 (0.68-1.73)<br>1.6 (0.98-2.6)<br>1.11 (0.73-1.69)<br>1.3 (0.89-2.05)<br>1.19 (0.76-1.86)<br>1.22 (0.77-1.93)<br>0.99 (0.65-1.52)<br>0.99 (0.63-1.55)<br>0.87 (0.56-1.35)<br>0.67 (0.42-1.08)<br>1.16 (0.74-1.84)<br>1.04 (0.65-1.67)<br>1.42 (0.87-2.32)<br>0.9 (0.59-1.36)<br>0.79 (0.51-1.24)<br>1.09 (0.71-1.66)<br>0.8 (0.51-1.25)<br>1.33 (0.87-2.05) | Age, random treatment assignment, body mass index, family history of colorectal cancer, history of colorectal polyps, physical activity, cigarette smoking, alcohol consumption, postmenopausal hormone therapy, and total energy intake. |

|                                                       |                                                                |     |                  |                                                   |                                                                                                  |                                                                                                                          |                                                                                                                                                                              |                                                                                                                                                                                                                                                                                                                                                                                                                                                                                       |
|-------------------------------------------------------|----------------------------------------------------------------|-----|------------------|---------------------------------------------------|--------------------------------------------------------------------------------------------------|--------------------------------------------------------------------------------------------------------------------------|------------------------------------------------------------------------------------------------------------------------------------------------------------------------------|---------------------------------------------------------------------------------------------------------------------------------------------------------------------------------------------------------------------------------------------------------------------------------------------------------------------------------------------------------------------------------------------------------------------------------------------------------------------------------------|
| Oba (2006);<br>Japanese (Japan) <sup>27</sup>         | 1993-2000 (Median<br>7.0)                                      | Men | CC               | 111                                               | 13894                                                                                            | Trans FA18:2                                                                                                             | 1.29 (0.84-1.98)                                                                                                                                                             | Age, height, BMI, total<br>pack-years of cigarette<br>smoking, alcohol intake, and<br>physical activity.                                                                                                                                                                                                                                                                                                                                                                              |
|                                                       |                                                                |     |                  |                                                   |                                                                                                  | TFA<br>SFA<br>MUFA<br>PUFA<br>Marine-derived PUFA                                                                        | 1.36 (0.83-2.24)<br>1.04 (0.65-1.66)<br>1.25 (0.78-1.99)<br>1.65 (1-2.74)<br>1.24 (0.8-1.95)                                                                                 |                                                                                                                                                                                                                                                                                                                                                                                                                                                                                       |
| Women                                                 | CC                                                             | 102 | 16327            | TFA<br>SFA<br>MUFA<br>PUFA<br>Marine-derived PUFA | 0.77 (0.47-1.27)<br>0.85 (0.53-1.36)<br>0.87 (0.53-1.44)<br>0.72 (0.44-1.18)<br>0.89 (0.56-1.44) |                                                                                                                          |                                                                                                                                                                              |                                                                                                                                                                                                                                                                                                                                                                                                                                                                                       |
|                                                       |                                                                |     |                  |                                                   |                                                                                                  |                                                                                                                          |                                                                                                                                                                              |                                                                                                                                                                                                                                                                                                                                                                                                                                                                                       |
| Hall (2008);<br>Caucasian<br>(U.S.A) <sup>29</sup>    | Physicians' Health<br>Study (PHS); 1984-<br>2006 (Median 17.6) | Men | CRC              | 500                                               | 21406                                                                                            | Total n-3 PUFA                                                                                                           | 0.76 (0.59-0.98)                                                                                                                                                             | Age, smoking (never<br>smoked, past smoking,<br>current smoking), body-mass<br>index (<23, 23 to 24.99, 25<br>to 26.99, ≥ 27), multivitamin<br>use (never use, past use,<br>current use), history of<br>diabetes, random assignment<br>to aspirin or placebo,<br>vigorous exercise (< once<br>per week, 1-4 times per<br>week, ≥ 5-6 times per<br>week), alcohol intake (≤<br>once per week, 2-6 times per<br>week, ≥ once-per day), and<br>quartile of red meat intake.              |
| Butler (2009);<br>Chinese<br>(Singapore) <sup>8</sup> | Singapore Chinese<br>Health Study; 1993-<br>2005 (Median 9.8)  | Men | Localized<br>CRC | 210                                               | 27293                                                                                            | TFA<br>SFA<br>MUFA<br>PUFA<br>Total n-3 PUFA<br>Marine PUFA<br>Total n-6 PUFA<br>Ratio n-3/ n-6<br>Ratio marine n-3 /n-6 | 0.9 (0.59-1.38)<br>0.85 (0.56-1.3)<br>1.07 (0.72-1.6)<br>0.97 (0.65-1.44)<br>0.78 (0.51-1.21)<br>1.4 (0.94-2.08)<br>0.92 (0.62-1.37)<br>0.93 (0.62-1.41)<br>1.08 (0.73-1.59) | Age at interview (yr), dialect<br>group (Cantonese, Hokkien),<br>interview year (1993-1995,<br>1996-1998), diabetes at<br>baseline (no, yes), smoking<br>history (never, "heavy" or<br>≥13 cigarettes per day<br>starting age <15 years,<br>"light" or non-heavy<br>smokers), body mass index<br>(<20, 20-23.9, 24-27.9, ≥28<br>m/kg <sup>2</sup> ), alcohol intake (0,<br><7, ≥7 drinks/week),<br>education (no formal<br>education, primary school,<br>secondary school or higher), |
|                                                       |                                                                |     | Advanced<br>CRC  | 291                                               | 27293                                                                                            | TFA<br>SFA<br>MUFA<br>PUFA<br>Total n-3 PUFA<br>Marine PUFA<br>Total n-6 PUFA                                            | 0.7 (0.49-1)<br>0.76 (0.54-1.07)<br>0.78 (0.55-1.11)<br>0.86 (0.61-1.2)<br>1.09 (0.8-1.5)<br>1.27 (0.93-1.75)<br>0.85 (0.61-1.19)                                            |                                                                                                                                                                                                                                                                                                                                                                                                                                                                                       |

|                                                  |                                                                     |             |               |     |       |                                                                                                                          |                                                                                                                                                                                |                                                                                                                                                 |
|--------------------------------------------------|---------------------------------------------------------------------|-------------|---------------|-----|-------|--------------------------------------------------------------------------------------------------------------------------|--------------------------------------------------------------------------------------------------------------------------------------------------------------------------------|-------------------------------------------------------------------------------------------------------------------------------------------------|
|                                                  |                                                                     |             |               |     |       | Ratio n-3/ n-6<br>Ratio marine n-3 /n-6                                                                                  | 1.32 (0.94-1.84)<br>1.54 (1.09-2.16)                                                                                                                                           | any weekly physical activity (no, yes), first degree relative diagnosed with colorectal cancer (no, yes), and total daily energy intake (kcal). |
|                                                  |                                                                     | Women       | Localized CRC | 166 | 34028 | TFA<br>SFA<br>MUFA<br>PUFA<br>Total n-3 PUFA<br>Marine PUFA<br>Total n-6 PUFA<br>Ratio n-3/ n-6<br>Ratio marine n-3 /n-6 | 1.86 (1.18-2.92)<br>1.69 (1.08-2.63)<br>1.72 (1.09-2.7)<br>0.91 (0.58-1.43)<br>1.19 (0.75-1.89)<br>0.7 (0.45-1.07)<br>0.91 (0.58-1.42)<br>0.82 (0.53-1.28)<br>0.86 (0.56-1.32) |                                                                                                                                                 |
|                                                  |                                                                     |             | Advanced CRC  | 236 | 34028 | TFA<br>SFA<br>MUFA<br>PUFA<br>Total n-3 PUFA<br>Marine PUFA<br>Total n-6 PUFA<br>Ratio n-3/ n-6<br>Ratio marine n-3 /n-6 | 0.88 (0.6-1.3)<br>0.88 (0.61-1.28)<br>1.07 (0.74-1.54)<br>1.03 (0.7-1.51)<br>1.09 (0.75-1.59)<br>1.46 (1-2.12)<br>1.01 (0.69-1.47)<br>1.15 (0.8-1.65)<br>1.32 (0.9-1.95)       |                                                                                                                                                 |
|                                                  |                                                                     | Men & Women | Localized CRC | 376 | 61321 | PUFA<br>Total n-3 PUFA<br>Marine PUFA<br>Total n-6 PUFA<br>Ratio n-3/ n-6<br>Ratio marine n-3 /n-6                       | 0.94 (0.7-1.26)<br>0.97 (0.71-1.32)<br>1.02 (0.76-1.37)<br>0.92 (0.68-1.23)<br>0.88 (0.65-1.19)<br>0.98 (0.73-1.3)                                                             |                                                                                                                                                 |
|                                                  |                                                                     |             | Advanced CRC  | 527 | 61321 | PUFA<br>Total n-3 PUFA<br>Marine PUFA<br>Total n-6 PUFA<br>Ratio n-3/ n-6<br>Ratio marine n-3 /n-6                       | 0.91 (0.71-1.17)<br>1.07 (0.84-1.36)<br>1.33 (1.05-1.7)<br>0.9 (0.7-1.16)<br>1.24 (0.97-1.59)<br>1.45 (1.12-1.87)                                                              |                                                                                                                                                 |
| Daniel (2009);<br>Caucasia (U.S.A) <sup>30</sup> | Cancer Prevention Study-II Nutrition Cohort; 1999-2005 (Median 6.0) | Women       | CRC           | 417 | 55972 | Total n-6 PUFA<br>Total n-3 PUFA<br>ALA<br>Marine PUFA<br>Ratio n-6/n-3<br>Ratio n-6/n-3 marine                          | 1.17 (0.88-1.55)<br>1.38 (1.02-1.85)<br>1.38 (1.02-1.85)<br>0.94 (0.72-1.24)<br>0.96 (0.72-1.3)<br>1.11 (0.84-1.45)                                                            |                                                                                                                                                 |
|                                                  |                                                                     | Men         | CRC           | 452 | 43108 | Total n-6 PUFA<br>Total n-3 PUFA<br>ALA<br>Marine PUFA<br>Ratio n-6/n-3                                                  | 0.81 (0.61-1.07)<br>0.86 (0.66-1.13)<br>0.87 (0.66-1.14)<br>1 (0.75-1.33)<br>1.04 (0.78-1.38)                                                                                  |                                                                                                                                                 |

|                                                    |                                                                                                 |       |     |     |       |                                                                                          |                                                                                                                                                           |                                                                                                                                                                                                                                                                                                                                                                                                                                                                             |
|----------------------------------------------------|-------------------------------------------------------------------------------------------------|-------|-----|-----|-------|------------------------------------------------------------------------------------------|-----------------------------------------------------------------------------------------------------------------------------------------------------------|-----------------------------------------------------------------------------------------------------------------------------------------------------------------------------------------------------------------------------------------------------------------------------------------------------------------------------------------------------------------------------------------------------------------------------------------------------------------------------|
|                                                    |                                                                                                 |       |     |     |       | Ratio n-6/n-3 marine                                                                     | 0.87 (0.66-1.15)                                                                                                                                          |                                                                                                                                                                                                                                                                                                                                                                                                                                                                             |
| Murff (2009);<br>Chinese (China) <sup>31</sup>     | Shanghai Women's<br>Health Study; 1997-<br>2007 (Median 7.4)                                    | Women | CRC | 332 | 73242 | LA<br>AA<br>Total n-6 PUFA<br>ALA<br>n-3 HUFA<br>Total n-3 PUFA<br>Ratio n-6/n-3         | 1.2 (0.62-2.34)<br>0.96 (0.62-1.5)<br>1.1 (0.57-2.12)<br>1.03 (0.52-2.05)<br>0.95 (0.62-1.45)<br>1.16 (0.56-2.39)<br>2.02 (0.85-4.8)                      | Age, energy intake in kcal,<br>total energy-adjusted n-6<br>PUFA intake in g/d, total<br>energy-adjusted n-3 PUFA<br>intake in g/d, energy-<br>adjusted ratio of total n-6<br>PUFA to n-3 PUFA intake,<br>body mass index in kg/m2,<br>current smoker, alcohol use,<br>regular physical activity in<br>past five years, total energy-<br>adjusted red meat intake in<br>g/d, menopausal status,<br>hormone replacement<br>therapy use, multivitamin<br>use and aspirin use. |
|                                                    |                                                                                                 |       | CC  | 200 | 73242 | LA<br>AA<br>Total n-6 PUFA<br>ALA<br>n-3 HUFA<br>Total n-3 PUFA<br>Ratio n-6/n-3         | 1.03 (0.53-2)<br>1.14 (0.67-1.94)<br>0.88 (0.4-1.92)<br>1.4 (0.58-3.37)<br>0.79 (0.46-1.34)<br>1.51 (0.61-3.74)<br>2.02 (0.85-4.8)                        |                                                                                                                                                                                                                                                                                                                                                                                                                                                                             |
|                                                    |                                                                                                 |       | RC  | 132 | 73242 | LA<br>AA<br>Total n-6 PUFA<br>ALA<br>n-3 HUFA<br>Total n-3 PUFA<br>Ratio n-6/n-3         | 2.05 (0.61-6.86)<br>0.68 (0.31-1.52)<br>1.37 (0.55-3.41)<br>0.64 (0.22-1.89)<br>1.39 (0.7-2.85)<br>0.75 (0.23-2.41)<br>1.62 (0.48-5.5)                    |                                                                                                                                                                                                                                                                                                                                                                                                                                                                             |
| Lee (2009);<br>Chinese (China) <sup>32</sup>       | Shanghai Women's<br>Health Study; 1997-<br>2007 (Median 7.4)                                    | Women | CRC | 394 | 73224 | TFA<br>SFA<br>MUFA<br>PUFA                                                               | 1.1 (0.7-1.7)<br>1.1 (0.7-1.6)<br>0.9 (0.6-1.3)<br>0.8 (0.5-1.3)                                                                                          | Age, education, income,<br>survey season, tea<br>consumption, NSAID use,<br>energy intake, and fiber intake                                                                                                                                                                                                                                                                                                                                                                 |
|                                                    |                                                                                                 |       | CC  | 236 | 73224 | TFA<br>SFA<br>MUFA<br>PUFA                                                               | 1.4 (0.8-2.3)<br>1.2 (0.8-2.1)<br>1 (0.6-1.7)<br>1.2 (0.7-2.1)                                                                                            |                                                                                                                                                                                                                                                                                                                                                                                                                                                                             |
|                                                    |                                                                                                 |       | RC  | 158 | 73224 | TFA<br>SFA<br>MUFA<br>PUFA                                                               | 0.8 (0.4-1.5)<br>0.8 (0.4-1.5)<br>0.7 (0.4-1.3)<br>0.5 (0.3-0.9)                                                                                          |                                                                                                                                                                                                                                                                                                                                                                                                                                                                             |
| Sasazuki (2011);<br>Japanese (Japan) <sup>33</sup> | Japan Public Health<br>Center (JPHC) -<br>based Prospective<br>Study; 1995-2006<br>(Median 9.3) | Men   | CC  | 521 | 41382 | EPA<br>DHA<br>DPA<br>N3 HUFA<br>ALA<br>Total n-3 PUFA<br>Total n-6 PUFA<br>Ratio n-3/n-6 | 0.81 (0.5-1.3)<br>1.02 (0.61-1.7)<br>0.86 (0.53-1.38)<br>0.96 (0.57-1.61)<br>0.84 (0.56-1.28)<br>0.76 (0.48-1.18)<br>0.85 (0.57-1.25)<br>1.22 (0.81-1.85) | Age, area, BMI, smoking<br>status, alcohol drinking, past<br>history of or medication use<br>for DM, METs, screening<br>for CRC, total calorie, intake<br>of calcium, vitamin D, fiber<br>and red meat.                                                                                                                                                                                                                                                                     |
|                                                    |                                                                                                 |       |     | 142 | 41382 | EPA                                                                                      | 0.27 (0.11-0.66)                                                                                                                                          |                                                                                                                                                                                                                                                                                                                                                                                                                                                                             |

|  |  |       |             |     |       |                                                                                          |                                                                                                                                                            |  |
|--|--|-------|-------------|-----|-------|------------------------------------------------------------------------------------------|------------------------------------------------------------------------------------------------------------------------------------------------------------|--|
|  |  |       | Proximal CC |     |       | DHA<br>DPA<br>N3 HUFA<br>ALA<br>Total n-3 PUFA<br>Total n-6 PUFA<br>Ratio n-3/n-6        | 0.48 (0.18-1.29)<br>0.35 (0.14-0.88)<br>0.35 (0.14-0.88)<br>0.61 (0.27-1.34)<br>0.42 (0.18-0.98)<br>0.46 (0.21-0.99)<br>0.92 (0.42-2.01)                   |  |
|  |  |       | Distal CC   | 197 | 41382 | EPA<br>DHA<br>DPA<br>N3 HUFA<br>ALA<br>Total n-3 PUFA<br>Total n-6 PUFA<br>Ratio n-3/n-6 | 1.34 (0.68-2.67)<br>1.83 (0.8-4.17)<br>1.8 (0.83-3.91)<br>1.82 (0.79-4.2)<br>1.31 (0.65-2.63)<br>1.07 (0.52-2.2)<br>1.59 (0.85-2.99)<br>1.23 (0.65-2.34)   |  |
|  |  |       | RC          | 253 | 41382 | EPA<br>DHA<br>DPA<br>N3 HUFA<br>ALA<br>Total n-3 PUFA<br>Total n-6 PUFA<br>Ratio n-3/n-6 | 1.06 (0.53-2.11)<br>1.12 (0.53-2.36)<br>1.34 (0.67-2.68)<br>1.07 (0.51-2.26)<br>1.1 (0.61-1.98)<br>1.33 (0.7-2.51)<br>0.86 (0.5-1.5)<br>1.62 (0.89-2.93)   |  |
|  |  |       | Invasive RC | 214 | 41382 | EPA<br>DHA<br>DPA<br>N3 HUFA<br>ALA<br>Total n-3 PUFA<br>Total n-6 PUFA<br>Ratio n-3/n-6 | 1.13 (0.53-2.38)<br>1.13 (0.5-2.54)<br>1.37 (0.65-2.91)<br>1.14 (0.51-2.57)<br>0.92 (0.49-1.74)<br>1.13 (0.57-2.24)<br>0.77 (0.43-1.4)<br>1.56 (0.82-2.97) |  |
|  |  | Women | CC          | 350 | 47192 | EPA<br>DHA<br>DPA<br>N3 HUFA<br>ALA<br>Total n-3 PUFA<br>Total n-6 PUFA<br>Ratio n-3/n-6 | 0.49 (0.27-0.89)<br>0.5 (0.28-0.9)<br>0.53 (0.29-1)<br>0.6 (0.31-1.14)<br>1.01 (0.65-1.57)<br>0.68 (0.41-1.12)<br>0.87 (0.57-1.31)<br>1.05 (0.61-1.79)     |  |
|  |  |       | Proximal CC | 171 | 47192 | EPA<br>DHA<br>DPA<br>N3 HUFA                                                             | 0.45 (0.2-1.05)<br>0.47 (0.2-1.14)<br>0.37 (0.16-0.85)<br>0.59 (0.24-1.45)                                                                                 |  |



|                                         |                                                                        |                |             |     |       |                                                                                          |                                                                                                                                                            |                                                                                                                                                                                                        |
|-----------------------------------------|------------------------------------------------------------------------|----------------|-------------|-----|-------|------------------------------------------------------------------------------------------|------------------------------------------------------------------------------------------------------------------------------------------------------------|--------------------------------------------------------------------------------------------------------------------------------------------------------------------------------------------------------|
|                                         |                                                                        |                |             |     |       | ALA<br>Total n-3 PUFA<br>Total n-6 PUFA<br>Ratio n-3/n-6                                 | 0.84 (0.45-1.59)<br>0.55 (0.27-1.11)<br>0.74 (0.4-1.35)<br>1.07 (0.5-2.3)                                                                                  |                                                                                                                                                                                                        |
|                                         |                                                                        |                | Distal CC   | 88  | 47192 | EPA<br>DHA<br>DPA<br>N3 HUFA<br>ALA<br>Total n-3 PUFA<br>Total n-6 PUFA<br>Ratio n-3/n-6 | 0.57 (0.17-1.91)<br>0.62 (0.17-2.22)<br>0.74 (0.23-2.42)<br>0.61 (0.17-2.24)<br>0.92 (0.38-2.22)<br>0.81 (0.28-2.33)<br>0.7 (0.32-1.57)<br>1.2 (0.4-3.62)  |                                                                                                                                                                                                        |
|                                         |                                                                        |                | RC          | 144 | 47192 | EPA<br>DHA<br>DPA<br>N3 HUFA<br>ALA<br>Total n-3 PUFA<br>Total n-6 PUFA<br>Ratio n-3/n-6 | 0.74 (0.3-1.82)<br>1.14 (0.46-2.81)<br>1.49 (0.57-3.87)<br>1.62 (0.61-4.32)<br>1.02 (0.5-2.06)<br>1.13 (0.51-2.49)<br>0.81 (0.42-1.56)<br>1 (0.44-2.27)    |                                                                                                                                                                                                        |
|                                         |                                                                        |                | Invasive RC | 126 | 47192 | EPA<br>DHA<br>DPA<br>N3 HUFA<br>ALA<br>Total n-3 PUFA<br>Total n-6 PUFA<br>Ratio n-3/n-6 | 0.78 (0.3-2.03)<br>1.36 (0.49-3.77)<br>1.25 (0.48-3.29)<br>1.51 (0.53-4.28)<br>0.87 (0.41-1.82)<br>1.16 (0.51-2.67)<br>0.65 (0.32-1.32)<br>1.14 (0.48-2.7) |                                                                                                                                                                                                        |
| Key (2011);<br>(UK) <sup>34</sup>       | United Kingdom<br>dietary Cohort<br>Consortium; 3.0 - 8.4              | Men &<br>Women | CRC         | 565 | 2516  | Total n-6 PUFA<br>Total n-3 PUFA<br>Ratio n-6/n-3                                        | 1.09 (0.77-1.55)<br>0.82 (0.59-1.13)<br>1.22 (0.92-1.63)                                                                                                   | Matched by age, date of<br>diary and sex, and adjusted<br>for exact age, height, weight,<br>energy intake, alcohol<br>intake, fiber intake, smoking,<br>education, social class,<br>physical activity. |
| Kantor (2013);<br>(U.S.A) <sup>35</sup> | VITamins and<br>Lifestyle (VITAL)<br>cohort; 2000-2008<br>(Median 6.7) | Men &<br>Women | CRC         | 488 | 68109 | EPA<br>DHA<br>Marine PUFA<br>Ratio marine n-3/n-6                                        | 0.91 (0.67-1.22)<br>0.86 (0.63-1.16)<br>0.88 (0.65-1.2)<br>0.85 (0.63-1.16)                                                                                | Age, sex, race/ethnicity,<br>education, BMI, energy<br>intake, MET-hours per week<br>of moderate/vigorous<br>activity, alcohol intake,<br>smoking history,<br>multivitamin use, calcium                |

|                                                          |                                                                      |             |             |      |       |                                                 |                                                                             |                                                                                                                                                                                                                                                                                                                                                                                                                                                          |
|----------------------------------------------------------|----------------------------------------------------------------------|-------------|-------------|------|-------|-------------------------------------------------|-----------------------------------------------------------------------------|----------------------------------------------------------------------------------------------------------------------------------------------------------------------------------------------------------------------------------------------------------------------------------------------------------------------------------------------------------------------------------------------------------------------------------------------------------|
|                                                          |                                                                      |             |             |      |       |                                                 |                                                                             | intake, dietary fiber intake, fruit and vegetable intake, red/processed meat intake, aspirin use, non-aspirin NSAID use, family history of colorectal cancer, history of sigmoidoscopy/colonoscopy, history of polyps, hormone replacement therapy, cardiovascular disease, memory loss, use of cholesterol-lowering drugs, and omega-6 (linoleic +arachidonic) intake.                                                                                  |
| Song (2014)<br>(U.S.A) <sup>36</sup>                     | Nurses' Health Study Cohort; 1984-2010 (Median 20.0)                 | Women       | CRC         | 1469 | 76386 | ALA<br>n-3 HUFA<br>Total n-6 PUFA               | 1.05 (0.86-1.29)<br>1.03 (0.89-1.2)<br>0.89 (0.7-1.12)                      | Age, calendar year, family history of colorectal cancer, prior lower gastrointestinal endoscopy, pack-years of smoking before age 30, body mass index, physical activity, current multivitamin use, postmenopausal status and hormone use for women, regular aspirin or NSAID use ( $\geq 2$ tablets/week), total caloric intake, red meat, process meat, alcohol consumption, and energy-adjusted intake of folate, calcium, vitamin D and total fiber. |
|                                                          |                                                                      |             | Proximal CC | 713  | 76386 | ALA<br>n-3 HUFA<br>Total n-6 PUFA               | 1.04 (0.78-1.4)<br>0.86 (0.69-1.08)<br>1.06 (0.76-1.48)                     |                                                                                                                                                                                                                                                                                                                                                                                                                                                          |
|                                                          |                                                                      |             | Distal CC   | 416  | 76386 | ALA<br>n-3 HUFA<br>Total n-6 PUFA               | 1.18 (0.81-1.71)<br>1.36 (1.03-1.8)<br>0.74 (0.48-1.15)                     |                                                                                                                                                                                                                                                                                                                                                                                                                                                          |
|                                                          |                                                                      |             | RC          | 310  | 76386 | ALA<br>n-3 HUFA<br>Total n-6 PUFA               | 0.84 (0.52-1.37)<br>1.06 (0.76-1.48)<br>0.72 (0.43-1.22)                    |                                                                                                                                                                                                                                                                                                                                                                                                                                                          |
| Song (2014);<br>(U.S.A) <sup>36</sup>                    | Health Professionals Follow-up Study Cohort; 1986-2010 (Median 22.0) | Men         | CRC         | 987  | 76386 | ALA<br>n-3 HUFA<br>Total n-6 PUFA               | 0.89 (0.7-1.13)<br>1.05 (0.85-1.3)<br>1.17 (0.95-1.44)                      |                                                                                                                                                                                                                                                                                                                                                                                                                                                          |
|                                                          |                                                                      |             | Proximal CC | 342  | 76386 | ALA<br>n-3 HUFA<br>Total n-6 PUFA               | 0.81 (0.53-1.23)<br>1.03 (0.72-1.47)<br>1.25 (0.88-1.79)                    |                                                                                                                                                                                                                                                                                                                                                                                                                                                          |
|                                                          |                                                                      |             | Distal CC   | 302  | 76386 | ALA<br>n-3 HUFA<br>Total n-6 PUFA               | 1.15 (0.75-1.75)<br>1.43 (0.97-2.11)<br>0.97 (0.66-1.41)                    |                                                                                                                                                                                                                                                                                                                                                                                                                                                          |
|                                                          |                                                                      |             | RC          | 215  | 76386 | ALA<br>n-3 HUFA<br>Total n-6 PUFA               | 0.68 (0.41-1.15)<br>0.79 (0.51-1.22)<br>1.3 (0.84-2.03)                     |                                                                                                                                                                                                                                                                                                                                                                                                                                                          |
| Kraja (2015);<br>Caucasian<br>(Netherland) <sup>37</sup> | Rotterdam study;<br>1990-2011 (Median 14.6)                          | Men & Women | CRC         | 222  | 4967  | UFA<br>Total n-6 PUFA<br>Total n-3 PUFA<br>SFAs | 0.95 (0.6-1.32)<br>0.89 (0.65-1.23)<br>1.44 (1.02-2.04)<br>1.13 (0.79-1.62) | Age, gender, energy-adjusted dietary fiber intake, and Dutch Healthy Diet index (excluding PUFA,                                                                                                                                                                                                                                                                                                                                                         |

|                                                         |                                                                                |                |     |      |        |                                                                                                                                                                                                                      |                                                                                                                                                                                                                                                                                                                                                                                          |                                                                                                                                                                                                                                                                                                                                                                                                                                                                                                                                                                                        |
|---------------------------------------------------------|--------------------------------------------------------------------------------|----------------|-----|------|--------|----------------------------------------------------------------------------------------------------------------------------------------------------------------------------------------------------------------------|------------------------------------------------------------------------------------------------------------------------------------------------------------------------------------------------------------------------------------------------------------------------------------------------------------------------------------------------------------------------------------------|----------------------------------------------------------------------------------------------------------------------------------------------------------------------------------------------------------------------------------------------------------------------------------------------------------------------------------------------------------------------------------------------------------------------------------------------------------------------------------------------------------------------------------------------------------------------------------------|
|                                                         |                                                                                |                |     |      |        |                                                                                                                                                                                                                      |                                                                                                                                                                                                                                                                                                                                                                                          | fish, SFA, and dietary fiber components).                                                                                                                                                                                                                                                                                                                                                                                                                                                                                                                                              |
| Hodge (2015);<br>Caucasian<br>(Australia) <sup>41</sup> | Melbourne<br>Collaborative Cohort<br>study (MCCS); 1990-<br>2002 (Median: 9.0) | Men &<br>Women | CRC | 395  | 4205   | FA 14:0<br>FA15:0<br>FA 16:0<br>FA 18:0<br>SFAs<br>FA16:1<br>FA 18:1<br>MUFAs<br>Trans fatty acid<br>FA 18:2<br>FA 20:3<br>FA 20:4<br>n-6 PUFA<br>FA 18:3<br>FA 20:5<br>FA 22:5<br>FA 22:6<br>n-3 PUFA<br>Total PUFA | 0.97 (0.68-1.39)<br>0.91 (0.62-1.32)<br>1.08 (0.76-1.52)<br>1.06 (0.75-1.51)<br>0.93 (0.66-1.32)<br>1.04 (0.74-1.47)<br>1.27 (0.89-1.81)<br>1.29 (0.91-1.83)<br>0.98 (0.69-1.40)<br>1.41 (0.99-1.99)<br>1.12 (0.79-1.60)<br>1.12 (0.79-1.58)<br>1.42 (1.00-2.01)<br>1.09 (0.77-1.53)<br>1.19 (0.84-1.68)<br>1.00 (0.71-1.42)<br>1.08 (0.76-1.53)<br>1.07 (0.76-1.50)<br>1.37 (0.97-1.93) | Education, alcohol intake,<br>smoking status, physical<br>activity, total energy intake,<br>and stratified by sex,<br>ethnicity (Southern-<br>European migrant vs.<br>Not)and family hityory of<br>cancer.                                                                                                                                                                                                                                                                                                                                                                             |
| Navarro (2016);<br>(U.S.A) <sup>40</sup>                | Women's Health<br>Initiative; 1993-2010<br>(Median 11.7)                       | Women          | CRC | 1952 | 134017 | TFA<br>Total n-6 PUFA<br>Total n-3 PUFA<br>Marine PUFA                                                                                                                                                               | 0.98 (0.76-1.27)<br>0.84 (0.68-1.05)<br>0.9 (0.74-1.09)<br>0.98 (0.84-1.13)                                                                                                                                                                                                                                                                                                              | Total energy<br>intake(continuous), age<br>(continuous), body mass<br>index (continuous),<br>education (high school,<br>technical school or<br>some college, college<br>graduate or post-graduate),<br>family history of colorectal<br>cancer (yes/no), history of<br>colonoscopy (yes/no),<br>current NSAID use (yes/no),<br>alcohol intake (continuous),<br>smoking history (never,<br>former, current), physical<br>activity (total metabolic<br>equivalent-hours,<br>continuous), ever use of<br>hormone therapy (never,<br>current/former), folate<br>(dietary folate equivalents |

|                                                 |                                                                                                      |             |             |      |        |                                                                          |                                                                                                                                                              |                                                                                                                                                                                                                    |
|-------------------------------------------------|------------------------------------------------------------------------------------------------------|-------------|-------------|------|--------|--------------------------------------------------------------------------|--------------------------------------------------------------------------------------------------------------------------------------------------------------|--------------------------------------------------------------------------------------------------------------------------------------------------------------------------------------------------------------------|
|                                                 |                                                                                                      |             |             |      |        |                                                                          |                                                                                                                                                              | g/day, continuous), calcium (mg/day, continuous), and red meat intake(g/day, continuous), and study component (observational study, clinical trial) and clinical trial randomization assignment and treatment arm. |
| Aglago (2019); Caucasian (Europe) <sup>42</sup> | European Prospective investigation into Cancer and Nutrition (EPIC) cohort; 1992-2014 (Median: 14.9) | Men & Women | CRC         | 6291 | 521324 | EPA<br>DPA<br>DHA<br>n-3HUFA<br>Ratio n-6/n-3 HUFA                       | 0.86 (0.78-0.95)<br>0.83 (0.75-0.92)<br>0.87 (0.78-0.96)<br>0.86 (0.78-0.95)<br>1.31 (1.18-1.45)                                                             | Body mass index, height, physical activity, smoking, education, and intakes of energy, alcohol, red and process meat, fiber, and dairy products and stratified age, sex, and center.                               |
|                                                 |                                                                                                      |             | CC          | 4197 | 521324 | EPA<br>DPA<br>DHA<br>n-3HUFA<br>Ratio n-6/n-3 HUFA                       | 0.87 (0.77-0.98)<br>0.83 (0.73-0.94)<br>0.87 (0.77-0.99)<br>0.85 (0.75-0.96)<br>1.32 (1.17-1.50)                                                             |                                                                                                                                                                                                                    |
|                                                 |                                                                                                      |             | Proximal CC | 1877 | 521324 | EPA<br>DPA<br>DHA<br>n-3HUFA<br>Ratio n-6/n-3 HUFA                       | 0.84 (0.70-1.01)<br>0.85 (0.71-1.03)<br>0.89 (0.74-1.06)<br>0.86 (0.72-1.04)<br>1.39 (1.15-1.68)                                                             |                                                                                                                                                                                                                    |
|                                                 |                                                                                                      |             | Distal CC   | 1743 | 521324 | EPA<br>DPA<br>DHA<br>n-3HUFA<br>Ratio n-6/n-3 HUFA                       | 0.94 (0.78-1.13)<br>0.82 (0.68-1.00)<br>0.89 (0.74-1.08)<br>0.86 (0.72-1.04)<br>1.14 (0.94-1.39)                                                             |                                                                                                                                                                                                                    |
|                                                 |                                                                                                      |             | RC          | 2094 | 521324 | EPA<br>DPA<br>DHA<br>n-3HUFA<br>Ratio n-6/n-3 HUFA                       | 0.87 (0.74-1.04)<br>0.84 (0.71-1.01)<br>0.87 (0.73-1.04)<br>0.91 (0.77-1.08)<br>1.24 (1.04-1.48)                                                             |                                                                                                                                                                                                                    |
| Shin (2020); Swedish (Sweden) <sup>43</sup>     | Swedish Women's Lifestyle and Health (WLH) cohort; 1991-2012 (Median: 21.3)                          | Women       | CRC         | 334  | 48,233 | Total n-3 PUFA<br>ALA<br>DPA<br>EPA<br>DHA<br>Total n-6 PUFA<br>LA<br>AA | 1.21 (0.88-1.67)<br>1.17 (0.86-1.59)<br>0.96 (0.71-1.29)<br>0.92 (0.69-1.24)<br>0.91 (0.67-1.22)<br>1.37 (1.00-1.87)<br>1.40 (1.02-1.92)<br>0.79 (0.58-1.07) | Body mass index, education, smoking history, and alcohol intake. Total caloric intake was adjusted by the residual method.                                                                                         |
|                                                 |                                                                                                      |             | CC          | 201  | 48,233 | Total n-3 PUFA<br>ALA                                                    | 1.18 (0.79-1.78)<br>0.96 (0.65-1.41)                                                                                                                         |                                                                                                                                                                                                                    |

|  |  |  |    |     |        |                |                  |  |
|--|--|--|----|-----|--------|----------------|------------------|--|
|  |  |  |    |     |        | DPA            | 0.95 (0.64-1.40) |  |
|  |  |  |    |     |        | EPA            | 1.11 (0.76-1.62) |  |
|  |  |  |    |     |        | DHA            | 1.19 (0.80-1.78) |  |
|  |  |  |    |     |        | Total n-6 PUFA | 1.09 (0.73-1.62) |  |
|  |  |  |    |     |        | LA             | 1.08 (0.73-1.62) |  |
|  |  |  |    |     |        | AA             | 0.79 (0.54-1.17) |  |
|  |  |  | RC | 133 | 48,233 | Total n-3 PUFA | 1.25 (0.74-2.12) |  |
|  |  |  |    |     |        | ALA            | 1.61 (0.98-2.66) |  |
|  |  |  |    |     |        | DPA            | 0.97 (0.61-1.55) |  |
|  |  |  |    |     |        | EPA            | 0.69 (0.43-1.11) |  |
|  |  |  |    |     |        | DHA            | 0.62 (0.39-0.98) |  |
|  |  |  |    |     |        | Total n-6 PUFA | 1.98 (1.17-3.32) |  |
|  |  |  |    |     |        | LA             | 2.11 (1.25-3.59) |  |
|  |  |  |    |     |        | AA             | 0.79 (0.49-1.29) |  |

TFA: Total fatty acids; SFAs: saturated fatty acids; MUFAs: monounsaturated fatty acids; PUFAs: polyunsaturated fatty acids; CRC: Colorectal cancer; CC: Colon cancer; RC: Rectal cancer; n-3 HUFAs: n-3 Highly unsaturated fatty acids.

Total fatty acids (TFA): SFA + MUFA + PUFA; Total *n*-6 PUFA: LA + AA; Total *n*-3 PUFA: EPA + DHA + DPA+ ALA or EPA + DHA + ALA; n-3 HUFA: EPA + DHA + DPA; Marine-derived PUFA: EPA + DHA.

## Supplementary Tables

**Supplementary Table 1. HRs (95% CIs) for colorectal cancer by quartile of specific fatty acid intake**

|                                           | Q1       | Q2               | Q3               | Q4               | P trend |
|-------------------------------------------|----------|------------------|------------------|------------------|---------|
| <b>Saturated fatty acids (SFA)</b>        |          |                  |                  |                  |         |
| Caproic acid C6:0                         | 1 (ref.) | 0.98 (0.81-1.20) | 0.90 (0.73-1.11) | 0.88 (0.69-1.11) | 0.20    |
| Caprylic acid C8:0                        | 1 (ref.) | 0.86 (0.71-1.04) | 0.93 (0.76-1.13) | 0.86 (0.70-1.06) | 0.23    |
| Capric acid C10:0                         | 1 (ref.) | 1.08 (0.89-1.30) | 0.93 (0.75-1.15) | 0.85 (0.67-1.08) | 0.08    |
| Henedecanoic C11:0                        | 1 (ref.) | 0.94 (0.78-1.14) | 0.90 (0.74-1.09) | 1.01 (0.84-1.22) | 0.79    |
| Lauric acid C12:0                         | 1 (ref.) | 0.86 (0.71-1.04) | 1.04 (0.87-1.26) | 1.01 (0.83-1.22) | 0.56    |
| Tridecanoic acid C13:0                    | 1 (ref.) | 0.90 (0.74-1.09) | 0.95 (0.77-1.16) | 0.78 (0.62-0.99) | 0.09    |
| Myristic acid C14:0                       | 1 (ref.) | 1.07 (0.88-1.30) | 0.94 (0.76-1.17) | 0.90 (0.70-1.15) | 0.25    |
| Pentadecanoic C15:0                       | 1 (ref.) | 1.04 (0.85-1.26) | 0.86 (0.69-1.06) | 0.92 (0.72-1.16) | 0.27    |
| Palmitic acid C16:0                       | 1 (ref.) | 1.00 (0.83-1.22) | 0.82 (0.66-1.01) | 1.00 (0.81-1.24) | 0.80    |
| Margaric acid C17:0                       | 1 (ref.) | 0.94 (0.78-1.14) | 1.08 (0.90-1.30) | 1.00 (0.83-1.21) | 0.72    |
| Stearic acid C18:0                        | 1 (ref.) | 0.89 (0.74-1.08) | 0.95 (0.77-1.16) | 0.85 (0.68-1.07) | 0.21    |
| Nonadecylic acid C19:0                    | 1 (ref.) | 1.04 (0.86-1.26) | 1.11 (0.91-1.35) | 1.07 (0.88-1.32) | 0.46    |
| Arachidic acid C20:0                      | 1 (ref.) | 0.97 (0.80-1.17) | 0.90 (0.74-1.10) | 0.98 (0.81-1.19) | 0.77    |
| Behenic acid C22:0                        | 1 (ref.) | 1.13 (0.93-1.38) | 1.06 (0.87-1.30) | 0.97 (0.79-1.19) | 0.34    |
| <b>Monounsaturated fatty acids (MUFA)</b> |          |                  |                  |                  |         |
| Myristoleic acid C14:1                    | 1 (ref.) | 0.99 (0.81-1.20) | 0.91 (0.74-1.13) | 0.83 (0.65-1.06) | 0.10    |
| Pentadecenoic acid C15:1                  | 1 (ref.) | 0.95 (0.78-1.15) | 0.86 (0.70-1.05) | 0.88 (0.70-1.10) | 0.20    |
| Palmitoleic acid C16:1                    | 1 (ref.) | 0.90 (0.75-1.09) | 1.02 (0.84-1.23) | 0.93 (0.76-1.13) | 0.66    |
| Heptadecenoic C17:1                       | 1 (ref.) | 1.00 (0.83-1.21) | 0.88 (0.72-1.09) | 0.88 (0.71-1.11) | 0.20    |
| Oleic acid C18:1                          | 1 (ref.) | 0.92 (0.76-1.12) | 0.91 (0.75-1.10) | 0.98 (0.81-1.19) | 0.89    |
| Gadoleic acid C20:1                       | 1 (ref.) | 0.99 (0.82-1.19) | 1.06 (0.88-1.27) | 0.91 (0.74-1.11) | 0.43    |
| Erucic acid C22:1                         | 1 (ref.) | 0.99 (0.81-1.20) | 1.02 (0.84-1.25) | 0.91 (0.73-1.13) | 0.33    |
| <b>Polyunsaturated fatty acids (PUFA)</b> |          |                  |                  |                  |         |
| Hexadecadienoic C16:2                     | 1 (ref.) | 0.95 (0.79-1.15) | 0.98 (0.81-1.18) | 1.03 (0.85-1.25) | 0.67    |
| Linoleic acid C18:2                       | 1 (ref.) | 1.18 (0.96-1.44) | 1.22 (0.99-1.49) | 1.19 (0.96-1.48) | 0.15    |
| Alpha Linolenic acid C18:3                | 1 (ref.) | 1.09 (0.89-1.33) | 1.25 (1.02-1.52) | 1.15 (0.92-1.43) | 0.18    |
| Eicosadienoic acid C20:2                  | 1 (ref.) | 0.99 (0.82-1.19) | 1.03 (0.85-1.24) | 1.05 (0.86-1.27) | 0.58    |
| Eicosatrienoic acid C20:3                 | 1 (ref.) | 0.94 (0.78-1.13) | 0.90 (0.75-1.09) | 0.87 (0.72-1.06) | 0.16    |

|                             |          |                  |                  |                  |      |
|-----------------------------|----------|------------------|------------------|------------------|------|
| Arachidonic acid C20:4      | 1 (ref.) | 0.89 (0.74-1.07) | 0.89 (0.74-1.08) | 0.89 (0.73-1.09) | 0.30 |
| Timnodonic acid C20:5       | 1 (ref.) | 1.05 (0.88-1.25) | 0.96 (0.79-1.16) | 0.93 (0.75-1.14) | 0.33 |
| Docosatrienoic acid C22:3   | 1 (ref.) | 0.95 (0.79-1.15) | 1.01 (0.83-1.22) | 0.85 (0.69-1.04) | 0.15 |
| Docosatetraenoic acid C22:4 | 1 (ref.) | 1.01 (0.84-1.21) | 0.94 (0.78-1.14) | 0.92 (0.75-1.12) | 0.32 |
| Docosapentaenoic acid C22:5 | 1 (ref.) | 1.12 (0.93-1.33) | 1.00 (0.82-1.21) | 0.99 (0.81-1.21) | 0.63 |
| Docosahexaenoic acid C22:6  | 1 (ref.) | 1.02 (0.86-1.22) | 0.95 (0.78-1.14) | 0.92 (0.76-1.13) | 0.34 |

*Cox proportional hazards model was adjusted for age, total energy intake (residual method), education levels, alcohol consumption (continuous - drinks/day), family history of CRC, history of other diseases (cancer, myocardial infarction, stroke or diabetes mellitus), BMI (continuous - kg/m<sup>2</sup>), physical activity (continuous - MET-hour/week), fiber intake, calcium intake (kcal/day, continuous) and was stratified income levels and cigarette smoking.*

**Supplementary Table 2. HRs (95% CIs) for colon cancer by quartile of major subtypes and specific fatty acid intakes**

|                                           | <b>Q1</b> | <b>Q2</b>        | <b>Q3</b>        | <b>Q4</b>        | <b>P trend</b> |
|-------------------------------------------|-----------|------------------|------------------|------------------|----------------|
| <b>Major subtypes of fatty acids</b>      |           |                  |                  |                  |                |
| TFA                                       | 1 (ref.)  | 1.05 (0.82-1.34) | 0.96 (0.74-1.24) | 0.98 (0.75-1.28) | 0.74           |
| SFA                                       | 1 (ref.)  | 0.79 (0.62-1.02) | 0.83 (0.64-1.08) | 0.86 (0.65-1.12) | 0.37           |
| MUFA                                      | 1 (ref.)  | 0.89 (0.70-1.14) | 1.01 (0.79-1.29) | 0.91 (0.70-1.17) | 0.63           |
| PUFA                                      | 1 (ref.)  | 1.22 (0.95-1.57) | 1.06 (0.81-1.38) | 1.10 (0.84-1.45) | 0.79           |
| Ratio (PUFA + MUFA)/SFA                   | 1 (ref.)  | 0.97 (0.76-1.23) | 0.99 (0.76-1.28) | 1.15 (0.88-1.50) | 0.25           |
| Total n-6 PUFA                            | 1 (ref.)  | 1.16 (0.90-1.50) | 1.16 (0.89-1.51) | 1.12 (0.85-1.47) | 0.56           |
| Total n-3 PUFA                            | 1 (ref.)  | 1.19 (0.93-1.52) | 1.12 (0.86-1.45) | 0.95 (0.71-1.28) | 0.57           |
| n-3 HUFA                                  | 1 (ref.)  | 1.04 (0.83-1.30) | 0.91 (0.71-1.17) | 0.95 (0.73-1.23) | 0.53           |
| Marine-derived PUFA                       | 1 (ref.)  | 1.00 (0.80-1.25) | 0.90 (0.70-1.14) | 0.93 (0.72-1.20) | 0.48           |
| Ratio n-6PUFA/n-3 PUFA                    | 1 (ref.)  | 0.98 (0.76-1.27) | 0.95 (0.73-1.24) | 1.19 (0.92-1.54) | 0.14           |
| <b>Specific fatty acids</b>               |           |                  |                  |                  |                |
| <b>Saturated fatty acids (SFA)</b>        |           |                  |                  |                  |                |
| Caproic acid C6:0                         | 1 (ref.)  | 1.04 (0.80-1.35) | 1.03 (0.79-1.36) | 1.00 (0.74-1.35) | 0.92           |
| Caprylic acid C8:0                        | 1 (ref.)  | 0.86 (0.67-1.10) | 0.95 (0.74-1.22) | 0.80 (0.61-1.05) | 0.16           |
| Capric acid C10:0                         | 1 (ref.)  | 1.16 (0.90-1.49) | 1.00 (0.76-1.32) | 0.93 (0.68-1.27) | 0.36           |
| Henedecanoic C11:0                        | 1 (ref.)  | 1.03 (0.81-1.31) | 0.96 (0.75-1.23) | 1.05 (0.82-1.34) | 0.74           |
| Lauric acid C12:0                         | 1 (ref.)  | 0.84 (0.66-1.07) | 1.01 (0.79-1.28) | 0.94 (0.74-1.21) | 0.94           |
| Tridecanoic acid C13:0                    | 1 (ref.)  | 0.93 (0.72-1.20) | 0.99 (0.76-1.29) | 0.79 (0.59-1.07) | 0.22           |
| Myristic acid C14:0                       | 1 (ref.)  | 0.97 (0.75-1.25) | 0.90 (0.68-1.18) | 0.90 (0.66-1.23) | 0.45           |
| Pentadecanoic C15:0                       | 1 (ref.)  | 1.07 (0.83-1.37) | 0.81 (0.61-1.07) | 0.93 (0.68-1.26) | 0.37           |
| Palmitic acid C16:0                       | 1 (ref.)  | 0.97 (0.76-1.24) | 0.83 (0.63-1.08) | 0.99 (0.76-1.30) | 0.89           |
| Margaric acid C17:0                       | 1 (ref.)  | 1.04 (0.82-1.31) | 1.20(0.95-1.51)  | 0.89 (0.69-1.15) | 0.55           |
| Stearic acid C18:0                        | 1 (ref.)  | 0.84 (0.65-1.08) | 0.95 (0.73-1.23) | 0.87 (0.65-1.16) | 0.49           |
| Nonadecylic acid C19:0                    | 1 (ref.)  | 1.04 (0.81-1.33) | 1.15 (0.90-1.48) | 1.01 (0.78-1.32) | 0.87           |
| Arachidic acid C20:0                      | 1 (ref.)  | 0.94 (0.73-1.19) | 0.92 (0.71-1.18) | 0.91 (0.71-1.18) | 0.50           |
| Behenic acid C22:0                        | 1 (ref.)  | 1.27 (0.98-1.64) | 0.96 (0.74-1.26) | 1.12 (0.86-1.46) | 0.84           |
| <b>Monounsaturated fatty acids (MUFA)</b> |           |                  |                  |                  |                |
| Myristoleic acid C14:1                    | 1 (ref.)  | 0.96 (0.75-1.24) | 0.93 (0.71-1.22) | 0.82 (0.60-1.12) | 0.22           |
| Pentadecenoic acid C15:1                  | 1 (ref.)  | 0.95 (0.74-1.23) | 0.94 (0.72-1.22) | 0.95 (0.71-1.22) | 0.73           |
| Palmitoleic acid C16:1                    | 1 (ref.)  | 0.88 (0.70-1.12) | 1.06 (0.84-1.35) | 0.89 (0.69-1.15) | 0.63           |
| Heptadecenoic C17:1                       | 1 (ref.)  | 0.98 (0.77-1.26) | 0.92 (0.71-1.20) | 0.90 (0.68-1.21) | 0.45           |



|                                           |          |                  |                  |                  |      |
|-------------------------------------------|----------|------------------|------------------|------------------|------|
| Oleic acid C18:1                          | 1 (ref.) | 0.98 (0.77-1.25) | 0.99 (0.77-1.26) | 0.98 (0.76-1.26) | 0.88 |
| Gadoleic acid C20:1                       | 1 (ref.) | 1.15 (0.91-1.45) | 1.21 (0.95-1.54) | 0.95 (0.73-1.23) | 0.68 |
| Erucic acid C22:1                         | 1 (ref.) | 0.98 (0.76-1.26) | 1.13 (0.87-1.45) | 0.86 (0.65-1.14) | 0.25 |
| <b>Polyunsaturated fatty acids (PUFA)</b> |          |                  |                  |                  |      |
| Hexadecadienoic C16:2                     | 1 (ref.) | 0.95 (0.75-1.22) | 1.05 (0.83-1.35) | 1.09 (0.85-1.40) | 0.37 |
| Linoleic acid C18:2                       | 1 (ref.) | 1.17 (0.90-1.51) | 1.18 (0.91-1.54) | 1.12 (0.85-1.47) | 0.57 |
| Alpha Linolenic acid C18:3                | 1 (ref.) | 1.16 (0.90-1.49) | 1.21 (0.93-1.57) | 0.98 (0.74-1.31) | 0.82 |
| Eicosadienoic acid C20:2                  | 1 (ref.) | 1.04 (0.82-1.31) | 1.06 (0.83-1.34) | 0.95 (0.74-1.23) | 0.72 |
| Eicosatrienoic acid C20:3                 | 1 (ref.) | 1.00 (0.78-1.27) | 0.97 (0.75-1.24) | 0.94 (0.73-1.20) | 0.57 |
| Arachidonic acid C20:4                    | 1 (ref.) | 0.89 (0.70-1.13) | 0.90 (0.70-1.15) | 0.93 (0.72-1.20) | 0.64 |
| Timnodonic acid C20:5                     | 1 (ref.) | 1.00 (0.80-1.25) | 0.90 (0.71-1.16) | 0.95 (0.74-1.23) | 0.61 |
| Docosatrienoic acid C22:3                 | 1 (ref.) | 0.93 (0.73-1.18) | 1.03 (0.81-1.31) | 0.80 (0.62-1.04) | 0.13 |
| Docosatetraenoic acid C22:4               | 1 (ref.) | 0.95 (0.75-1.21) | 0.93 (0.73-1.19) | 0.93 (0.72-1.20) | 0.59 |
| Docosapentaenoic acid C22:5               | 1 (ref.) | 1.18 (0.94-1.48) | 0.95 (0.74-1.23) | 1.03 (0.80-1.34) | 0.80 |
| Docosahexaenoic acid C22:6                | 1 (ref.) | 1.02 (0.81-1.27) | 0.92 (0.72-1.18) | 0.95 (0.73-1.22) | 0.56 |

*Cox proportional hazards model was adjusted for age, total energy intake (residual method), education levels, alcohol consumption (continuous - drinks/day), family history of CRC, history of other diseases (cancer, myocardial infarction, stroke or diabetes mellitus), BMI (continuous - kg/m<sup>2</sup>), physical activity (continuous - MET-hour/week), fiber intake, calcium intake (kcal/day, continuous) and was stratified income levels and cigarette smoking.*

Total fatty acids (TFA): SFA + MUFA + PUFA; Total n-6 PUFA: LA + AA; Total n-3 PUFA: EPA + DHA + ALA + DPA; n-3 HUFA: EPA + DHA + DPA; Marine-derived PUFA: EPA + DHA.

**Supplementary Table 3. HRs (95% CIs) for rectal cancer by quartile of major subtypes and specific fatty acid intakes**

|                                           | Q1       | Q2               | Q3               | Q4               | P trend |
|-------------------------------------------|----------|------------------|------------------|------------------|---------|
| <b>Major subtypes of fatty acids</b>      |          |                  |                  |                  |         |
| TFA                                       | 1 (ref.) | 1.13 (0.83-1.52) | 0.83 (0.60-1.16) | 1.14 (0.82-1.57) | 0.69    |
| SFA                                       | 1 (ref.) | 1.03 (0.76-1.39) | 0.87 (0.62-1.21) | 1.03 (0.73-1.44) | 0.97    |
| MUFA                                      | 1 (ref.) | 0.90 (0.67-1.21) | 0.74 (0.54-1.03) | 1.03 (0.76-1.39) | 0.95    |
| PUFA                                      | 1 (ref.) | 1.06 (0.77-1.45) | 1.18 (0.85-1.63) | 1.31 (0.94-1.84) | 0.08    |
| Ratio (PUFA + MUFA)/SFA                   | 1 (ref.) | 0.90 (0.66-1.23) | 1.01 (0.73-1.39) | 1.13 (0.82-1.57) | 0.29    |
| Total n-6 PUFA                            | 1 (ref.) | 1.16 (0.84-1.59) | 1.27 (0.92-1.76) | 1.30 (0.92-1.83) | 0.12    |
| Total n-3 PUFA                            | 1 (ref.) | 0.90 (0.65-1.24) | 1.24 (0.90-1.71) | 1.32 (0.94-1.87) | 0.04    |
| n-3 HUFA                                  | 1 (ref.) | 1.16 (0.87-1.54) | 0.99 (0.73-1.34) | 0.94 (0.68-1.30) | 0.49    |
| Marine-derived PUFA                       | 1 (ref.) | 1.11 (0.84-1.47) | 0.98 (0.72-1.33) | 0.90 (0.65-1.25) | 0.39    |
| Ratio n-6PUFA/n-3 PUFA                    | 1 (ref.) | 0.93 (0.67-1.29) | 1.11 (0.81-1.52) | 0.98 (0.71-1.36) | 0.90    |
| <b>Specific fatty acids</b>               |          |                  |                  |                  |         |
| <b>Saturated fatty acids (SFA)</b>        |          |                  |                  |                  |         |
| Caproic acid C6:0                         | 1 (ref.) | 0.92 (0.68-1.23) | 0.74 (0.53-1.03) | 0.72 (0.50-1.05) | 0.05    |
| Caprylic acid C8:0                        | 1 (ref.) | 0.86 (0.63-1.17) | 0.89 (0.65-1.22) | 0.95 (0.69-1.32) | 0.85    |
| Capric acid C10:0                         | 1 (ref.) | 0.98 (0.73-1.31) | 0.84 (0.60-1.17) | 0.75 (0.51-1.10) | 0.09    |
| Henecanoic C11:0                          | 1 (ref.) | 0.82 (0.61-1.11) | 0.82 (0.61-1.10) | 0.96 (0.71-1.28) | 0.99    |
| Lauric acid C12:0                         | 1 (ref.) | 0.88 (0.65-1.21) | 1.11 (0.82-1.49) | 1.11 (0.82-1.51) | 0.30    |
| Tridecanoic acid C13:0                    | 1 (ref.) | 0.86 (0.64-1.16) | 0.89 (0.64-1.23) | 0.76 (0.52-1.11) | 0.24    |
| Myristic acid C14:0                       | 1 (ref.) | 1.23 (0.91-1.67) | 1.02 (0.72-1.44) | 0.89 (0.59-1.33) | 0.38    |
| Pentadecanoic C15:0                       | 1 (ref.) | 1.00 (0.73-1.35) | 0.94 (0.67-1.31) | 0.90 (0.61-1.32) | 0.53    |
| Palmitic acid C16:0                       | 1 (ref.) | 1.07 (0.79-1.44) | 0.80 (0.57-1.12) | 1.02 (0.73-1.42) | 0.83    |
| Margaric acid C17:0                       | 1 (ref.) | 0.80 (0.59-1.09) | 0.90 (0.67-1.22) | 1.15 (0.86-1.54) | 0.19    |
| Stearic acid C18:0                        | 1 (ref.) | 0.98 (0.73-1.33) | 0.95 (0.69-1.32) | 0.82 (0.57-1.18) | 0.26    |
| Nonadecylic acid C19:0                    | 1 (ref.) | 1.04 (0.76-1.41) | 1.04 (0.76-1.43) | 1.18 (0.86-1.63) | 0.32    |
| Arachidic acid C20:0                      | 1 (ref.) | 1.03 (0.76-1.39) | 0.87 (0.63-1.20) | 1.10 (0.80-1.49) | 0.71    |
| Behenic acid C22:0                        | 1 (ref.) | 0.96 (0.70-1.31) | 1.22 (0.90-1.64) | 0.75 (0.54-1.05) | 0.07    |
| <b>Monounsaturated fatty acids (MUFA)</b> |          |                  |                  |                  |         |
| Myristoleic acid C14:1                    | 1 (ref.) | 1.03 (0.76-1.39) | 0.89 (0.64-1.26) | 0.85 (0.58-1.26) | 0.28    |
| Pentadecenoic acid C15:1                  | 1 (ref.) | 0.94 (0.70-1.26) | 0.75 (0.54-1.05) | 0.78 (0.54-1.13) | 0.11    |

|                                           |          |                  |                  |                  |      |
|-------------------------------------------|----------|------------------|------------------|------------------|------|
| Palmitoleic acid C16:1                    | 1 (ref.) | 0.94 (0.70-1.27) | 0.95 (0.70-1.29) | 0.98 (0.71-1.33) | 0.91 |
| Heptadecenoic C17:1                       | 1 (ref.) | 1.04 (0.77-1.39) | 0.83 (0.60-1.16) | 0.86 (0.60-1.24) | 0.29 |
| Oleic acid C18:1                          | 1 (ref.) | 0.85 (0.63-1.15) | 0.80 (0.58-1.09) | 0.99 (0.73-1.34) | 0.96 |
| Gadoleic acid C20:1                       | 1 (ref.) | 0.77 (0.58-1.04) | 0.86 (0.64-1.16) | 0.86 (0.63-1.17) | 0.48 |
| Erucic acid C22:1                         | 1 (ref.) | 1.00 (0.74-1.35) | 0.87 (0.62-1.20) | 0.99 (0.71-1.39) | 0.91 |
| <b>Polyunsaturated fatty acids (PUFA)</b> |          |                  |                  |                  |      |
| Hexadecadienoic C16:2                     | 1 (ref.) | 0.95 (0.71-1.28) | 0.87 (0.64-1.18) | 0.95 (0.70-1.29) | 0.68 |
| Linoleic acid C18:2                       | 1 (ref.) | 1.19 (0.87-1.64) | 1.28 (0.92-1.77) | 1.34 (0.95-1.88) | 0.10 |
| Alpha Linolenic acid C18:3                | 1 (ref.) | 0.99 (0.72-1.37) | 1.31 (0.95-1.81) | 1.45 (1.03-2.05) | 0.01 |
| Eicosadienoic acid C20:2                  | 1 (ref.) | 0.91 (0.67-1.24) | 0.99 (0.73-1.34) | 1.18 (0.88-1.59) | 0.18 |
| Eicosatrienoic acid C20:3                 | 1 (ref.) | 0.87 (0.65-1.16) | 0.82 (0.61-1.11) | 0.78 (0.58-1.06) | 0.12 |
| Arachidonic acid C20:4                    | 1 (ref.) | 0.89 (0.66-1.20) | 0.88 (0.65-1.19) | 0.84 (0.61-1.16) | 0.30 |
| Timnodonic acid C20:5                     | 1 (ref.) | 1.13 (0.85-1.51) | 1.06 (0.78-1.43) | 0.89 (0.64-1.24) | 0.38 |
| Docosatrienoic acid C22:3                 | 1 (ref.) | 0.99 (0.74-1.33) | 0.97 (0.71-1.31) | 0.94 (0.68-1.30) | 0.69 |
| Docosatetraenoic acid C22:4               | 1 (ref.) | 1.10 (0.82-1.47) | 0.96 (0.70-1.31) | 0.89 (0.65-1.24) | 0.37 |
| Docosapentaenoic acid C22:5               | 1 (ref.) | 1.02 (0.76-1.36) | 1.06 (0.79-1.43) | 0.93 (0.67-1.28) | 0.66 |
| Docosahexaenoic acid C22:6                | 1 (ref.) | 1.03 (0.78-1.37) | 0.98 (0.73-1.33) | 0.89 (0.65-1.23) | 0.44 |

*Cox proportional hazards model was adjusted for age, total energy intake (residual method), education levels, alcohol consumption (continuous - drinks/day), family history of CRC, history of other diseases (cancer, myocardial infarction, stroke or diabetes mellitus), BMI (continuous - kg/m<sup>2</sup>), physical activity (continuous - MET-hour/week), fiber intake, calcium intake (kcal/day, continuous) and was stratified income levels and cigarette smoking.*

Total fatty acids (TFA): SFA + MUFA + PUFA; Total n-6 PUFA: LA + AA; Total n-3 PUFA: EPA + DHA + ALA + DPA; n-3 HUFA: EPA + DHA + DPA; Marine-derived PUFA: EPA + DHA.

**Supplementary Table 4: Spearman rank correlation (*r*) between dietary fatty acid intake and food groups\***

| <b>Fatty acids</b>                        | <b>Grains</b> | <b>Fruit</b> | <b>Vegetable</b> | <b>Dairy</b> | <b>Fish</b> | <b>Nut<br/>bean</b> | <b>Legume</b> | <b>Red<br/>meat</b> | <b>Poultry</b> | <b>Eggs</b> |
|-------------------------------------------|---------------|--------------|------------------|--------------|-------------|---------------------|---------------|---------------------|----------------|-------------|
| <b>Major subtypes of fatty acids</b>      |               |              |                  |              |             |                     |               |                     |                |             |
| TFA                                       | -0.59         | 0.07         | 0.09             | 0.20         | 0.27        | 0.27                | 0.11          | 0.55                | 0.39           | 0.20        |
| SFA                                       | -0.59         | 0.09         | 0.07             | 0.37         | 0.28        | 0.17                | 0.06          | 0.51                | 0.40           | 0.23        |
| MUFA                                      | -0.53         | 0.05         | 0.04             | 0.15         | 0.23        | 0.15                | 0.06          | 0.65                | 0.40           | 0.18        |
| PUFA                                      | -0.54         | 0.08         | 0.18             | 0.05         | 0.26        | 0.56                | 0.23          | 0.33                | 0.32           | 0.13        |
| Ratio (PUFA + MUFA)/SFA                   | 0.17          | -0.09        | 0.04             | -0.70        | -0.12       | 0.31                | 0.14          | 0.02                | -0.10          | -0.21       |
| Total n-6 PUFA                            | -0.54         | 0.08         | 0.18             | 0.04         | 0.23        | 0.58                | 0.24          | 0.29                | 0.31           | 0.14        |
| Total n-3 PUFA                            | -0.60         | 0.11         | 0.21             | 0.12         | 0.44        | 0.51                | 0.24          | 0.38                | 0.30           | 0.09        |
| n-3 HUFA                                  | -0.39         | 0.10         | 0.12             | 0.02         | 0.73        | 0.12                | 0.10          | 0.14                | 0.19           | 0.03        |
| Marine-derived PUFA                       | -0.39         | 0.10         | 0.12             | 0.02         | 0.72        | 0.12                | 0.10          | 0.14                | 0.19           | 0.03        |
| Ratio n-6PUFA/n-3 PUFA                    | 0.28          | -0.10        | -0.09            | -0.19        | -0.49       | 0.05                | -0.04         | -0.26               | -0.05          | 0.07        |
| <b>Saturated fatty acids (SFA)</b>        |               |              |                  |              |             |                     |               |                     |                |             |
| Caproic acid C6:0                         | -0.37         | 0.22         | 0.04             | 0.94         | 0.06        | -0.02               | -0.00         | -0.68               | 0.07           | 0.17        |
| Caprylic acid C8:0                        | -0.42         | 0.08         | -0.02            | 0.55         | 0.06        | -0.03               | -0.02         | 0.40                | 0.15           | 0.11        |
| Capric acid C10:0                         | -0.41         | 0.21         | 0.04             | 0.93         | 0.08        | -0.02               | -0.00         | 0.04                | 0.11           | 0.17        |
| Henedecanoic C11:0                        | -0.35         | -0.06        | -0.07            | -0.02        | 0.05        | 0.01                | -0.04         | 0.43                | 0.13           | 0.21        |
| Lauric acid C12:0                         | -0.39         | 0.03         | -0.03            | 0.19         | 0.10        | -0.00               | -0.00         | 0.68                | 0.23           | 0.08        |
| Tridecanoic acid C13:0                    | -0.40         | 0.26         | 0.08             | 0.92         | 0.17        | -0.00               | 0.03          | -0.04               | 0.11           | 0.17        |
| Myristic acid C14:0                       | -0.53         | 0.21         | 0.07             | 0.82         | 0.28        | 0.03                | 0.03          | 0.20                | 0.23           | 0.19        |
| Pentadecanoic C15:0                       | -0.56         | 0.20         | 0.10             | 0.75         | 0.38        | 0.04                | 0.04          | 0.21                | 0.27           | 0.20        |
| Palmitic acid C16:0                       | -0.58         | 0.07         | 0.08             | 0.29         | 0.29        | 0.20                | 0.07          | 0.49                | 0.42           | 0.25        |
| Margaric acid C17:0                       | -0.31         | -0.03        | -0.04            | -0.05        | 0.09        | -0.00               | -0.00         | 0.74                | 0.23           | 0.03        |
| Stearic acid C18:0                        | -0.61         | 0.12         | 0.09             | 0.48         | 0.28        | 0.17                | 0.07          | 0.43                | 0.40           | 0.27        |
| Nonadecylic acid C19:0                    | -0.51         | 0.07         | 0.13             | 0.04         | 0.29        | 0.45                | 0.09          | 0.32                | 0.38           | 0.09        |
| Arachidic acid C20:0                      | -0.54         | 0.08         | 0.08             | 0.24         | 0.24        | 0.17                | 0.12          | 0.61                | 0.41           | 0.09        |
| Behenic acid C22:0                        | -0.43         | 0.18         | 0.20             | 0.17         | 0.20        | 0.41                | 0.27          | 0.13                | 0.26           | 0.10        |
| <b>Monounsaturated fatty acids (MUFA)</b> |               |              |                  |              |             |                     |               |                     |                |             |
| Myristoleic acid C14:1                    | -0.43         | 0.25         | 0.08             | 0.92         | 0.23        | 0.00                | 0.03          | -0.01               | 0.13           | 0.18        |
| Pentadecenoic acid C15:1                  | -0.43         | 0.21         | 0.10             | 0.77         | 0.31        | 0.05                | 0.02          | 0.04                | 0.16           | 0.16        |

|                                    |       |       |       |       |      |       |       |      |      |      |
|------------------------------------|-------|-------|-------|-------|------|-------|-------|------|------|------|
| Palmitoleic acid C16:1             | -0.45 | 0.08  | 0.03  | 0.17  | 0.26 | 0.05  | 0.04  | 0.63 | 0.36 | 0.13 |
| Heptadecenoic C17:1                | -0.52 | 0.21  | 0.19  | 0.44  | 0.74 | 0.15  | 0.11  | 0.15 | 0.25 | 0.27 |
| Oleic acid C18:1                   | -0.53 | 0.04  | 0.04  | 0.13  | 0.22 | 0.17  | 0.07  | 0.64 | 0.40 | 0.18 |
| Gadoleic acid C20:1                | -0.36 | 0.04  | 0.10  | -0.06 | 0.55 | 0.18  | 0.08  | 0.43 | 0.23 | 0.03 |
| Erucic acid C22:1                  | -0.59 | 0.28  | 0.10  | 0.47  | 0.44 | 0.08  | 0.06  | 0.07 | 0.24 | 0.18 |
| <b>Polyunsaturated fatty acids</b> |       |       |       |       |      |       |       |      |      |      |
| Hexadecadienoic C16:2              | -0.42 | 0.04  | 0.04  | 0.15  | 0.22 | 0.07  | 0.03  | 0.54 | 0.61 | 0.08 |
| Linoleic acid C18:2                | -0.54 | 0.08  | 0.18  | 0.04  | 0.23 | 0.58  | 0.24  | 0.29 | 0.31 | 0.14 |
| Alpha Linolenic acid C18:3         | -0.59 | 0.10  | 0.20  | 0.13  | 0.31 | 0.54  | 0.24  | 0.40 | 0.30 | 0.09 |
| Eicosadienoic acid C20:2           | -0.29 | -0.05 | -0.05 | -0.07 | 0.07 | -0.01 | -0.01 | 0.75 | 0.21 | 0.09 |
| Eicosatrienoic acid C20:3          | -0.25 | 0.14  | 0.17  | 0.08  | 0.59 | 0.11  | 0.09  | 0.06 | 0.21 | 0.06 |
| Arachidonic acid C20:4             | -0.51 | 0.11  | 0.14  | 0.11  | 0.56 | 0.17  | 0.08  | 0.33 | 0.38 | 0.54 |
| Timnodonic acid C20:5              | -0.37 | 0.13  | 0.18  | 0.03  | 0.85 | 0.17  | 0.14  | 0.21 | 0.23 | 0.05 |
| Docosatrienoic acid C22:3          | -0.39 | 0.22  | 0.22  | 0.11  | 0.81 | 0.17  | 0.17  | 0.13 | 0.28 | 0.08 |
| Docosatetraenoic acid C22:4        | -0.45 | 0.15  | 0.17  | 0.15  | 0.61 | 0.18  | 0.11  | 0.13 | 0.21 | 0.66 |
| Docosapentaenoic acid C22:5        | -0.37 | 0.14  | 0.17  | 0.04  | 0.87 | 0.16  | 0.15  | 0.17 | 0.22 | 0.05 |
| Docosahexaenoic acid C22:6         | -0.33 | 0.11  | 0.16  | 0.02  | 0.82 | 0.15  | 0.14  | 0.16 | 0.19 | 0.04 |

\*: All *p* value <0.001

Total fatty acids (TFA): SFA + MUFA + PUFA; Total *n*-6 PUFA: LA + AA; Total *n*-3 PUFA: EPA + DHA + ALA + DPA; *n*-3 HUFA: EPA + DHA + DPA; Marine-derived PUFA: EPA + DHA.

**Supplementary Table 5. Meta-analysis of the association between types of dietary fatty acid intakes (highest vs lowest intake) and the risk of CRC among men and women by cancer sites**

| Fatty acids                | # of studies | RR (95% CI)      | Test for heterogeneity |                    | Test for publication bias |                         |  |
|----------------------------|--------------|------------------|------------------------|--------------------|---------------------------|-------------------------|--|
|                            |              |                  | p <sup>a</sup>         | I <sup>2</sup> (%) | p for Egger <sup>b</sup>  | p for Begg <sup>c</sup> |  |
| <b>Major fatty acids</b>   |              |                  |                        |                    |                           |                         |  |
| TFA                        |              |                  |                        |                    |                           |                         |  |
| Colon                      | 11           | 1.04 (0.89-1.21) | 0.03                   | 48.8               | 0.95                      | 0.37                    |  |
| Rectum                     | 6            | 1.01 (0.86-1.18) | 0.91                   | 0.0                | 0.66                      | 1.0                     |  |
| SFA                        |              |                  |                        |                    |                           |                         |  |
| Colon                      | 10           | 0.98 (0.85-1.14) | 0.28                   | 16.8               | 0.44                      | 0.44                    |  |
| Rectum                     | 5            | 0.95 (0.74-1.20) | 0.54                   | 0.0                | 0.62                      | 0.81                    |  |
| MUFA                       |              |                  |                        |                    |                           |                         |  |
| Colon                      | 10           | 0.96 (0.84-1.10) | 0.32                   | 12.9               | 0.08                      | 0.12                    |  |
| Rectum                     | 5            | 1.02 (0.79-1.32) | 0.27                   | 22.8               | 0.62                      | 1.0                     |  |
| PUFA                       |              |                  |                        |                    |                           |                         |  |
| Colon                      | 6            | 1.06 (0.86-1.29) | 0.16                   | 35.1               | 0.78                      | 1.0                     |  |
| Rectum                     | 4            | 0.90 (0.57-1.44) | 0.02                   | 68.5               | 0.69                      | 0.73                    |  |
| Total n-6PUFA              |              |                  |                        |                    |                           |                         |  |
| Colon                      | 6            | 1.01 (0.89-1.14) | 0.70                   | 0.0                | 0.14                      | 0.08                    |  |
| Rectum                     | 6            | 1.14 (0.88-1.48) | 0.11                   | 42.0               | 0.61                      | 0.76                    |  |
| Total n-3PUFA              |              |                  |                        |                    |                           |                         |  |
| Colon                      | 5            | 0.89 (0.72-1.08) | 0.30                   | 17.4               | 0.90                      | 1.0                     |  |
| Rectum                     | 4            | 1.25 (0.98-1.86) | 0.92                   | 0.0                | 0.08                      | 0.09                    |  |
| n-3HUFA                    |              |                  |                        |                    |                           |                         |  |
| Colon                      | 6            | 0.97 (0.84-1.13) | 0.03                   | 52.4               | 0.46                      | 1.0                     |  |
| Rectum                     | 6            | 0.95 (0.84-1.08) | 0.71                   | 0.0                | 0.11                      | 0.23                    |  |
| Marine-derived PUFA        |              |                  |                        |                    |                           |                         |  |
| Colon                      | 2            | 0.97 (0.80-1.19) | 0.49                   | 0.0                | 0.69                      | 1.0                     |  |
| Rectum                     | 1            | 0.90 (0.64-1.24) | -                      | -                  | -                         | -                       |  |
| <b>Type of fatty acids</b> |              |                  |                        |                    |                           |                         |  |
| LA (C18:2)                 |              |                  |                        |                    |                           |                         |  |
| Colon                      | 7            | 1.06 (0.92-1.22) | 0.55                   | 0.0                | 0.20                      | 0.37                    |  |
| Rectum                     | 5            | 1.42 (1.11-1.81) | 0.32                   | 14.1               | 0.43                      | 0.46                    |  |
| AA (C20:4)                 |              |                  |                        |                    |                           |                         |  |
| Colon                      | 3            | 0.92 (0.85-1.12) | 0.54                   | 0.0                | 0.81                      | 1.0                     |  |
| Rectum                     | 3            | 0.81 (0.63-1.04) | 0.89                   | 0.0                | 0.05                      | 0.3                     |  |
| ALA (C18:3)                |              |                  |                        |                    |                           |                         |  |
| Colon                      | 8            | 0.99 (0.89-1.11) | 0.95                   | 0.0                | 0.58                      | 1.0                     |  |
| Rectum                     | 8            | 1.06 (0.87-1.30) | 0.21                   | 26.6               | 0.18                      | 0.25                    |  |
| EPA (C20:5)                |              |                  |                        |                    |                           |                         |  |
| Colon                      | 5            | 0.88 (0.78-0.99) | 0.34                   | 12.0               | 0.64                      | 0.45                    |  |
| Rectum                     | 5            | 0.88 (0.77-1.01) | 0.65                   | 0.0                | 0.78                      | 1.0                     |  |

|             |   |                  |      |      |       |      |
|-------------|---|------------------|------|------|-------|------|
| DHA (C22:6) |   |                  |      |      |       |      |
| Colon       | 5 | 0.90 (0.78-1.03) | 0.27 | 22.2 | 0.98  | 1.0  |
| Rectum      | 3 | 0.87 (0.76-1.00) | 0.65 | 0.0  | 0.64  | 0.45 |
| DPA (C22:5) |   |                  |      |      |       |      |
| Colon       | 4 | 0.87 (0.76-0.99) | 0.31 | 16.3 | 0.92  | 0.46 |
| Rectum      | 2 | 0.90 (0.78-1.03) | 0.55 | 0.0  | 0.004 | 0.09 |

*a: p value for heterogeneity*

*b: p of Egger, p value of Egger rank correlation method for testing publication bias*

*c: p of Begg, p value of Begg rank correlation method for testing publication bias*

*d: p value for effect modification by gender (only women, only men, and men & women)*

Total fatty acids (TFA): SFA + MUFA + PUFA; Total *n*-6 PUFA: LA + AA; Total *n*-3 PUFA: EPA + DHA + ALA + DPA or EPA + DHA + ALA; *n*-3 HUFA: EPA + DHA + DPA; Marine-derived PUFA: EPA + DHA.

**Supplementary Table 6. Meta-analysis of the association between types of dietary fatty acid intakes (highest vs lowest intake) and the risk of CRC among men and women by geographic region**

| Fatty acids                | # of studies | RR (95% CI)      | Test for heterogeneity |                    | Test for publication bias |                         |  |
|----------------------------|--------------|------------------|------------------------|--------------------|---------------------------|-------------------------|--|
|                            |              |                  | p <sup>a</sup>         | I <sup>2</sup> (%) | p for Egger <sup>b</sup>  | p for Begg <sup>c</sup> |  |
| <b>Major fatty acids</b>   |              |                  |                        |                    |                           |                         |  |
| <b>TFA</b>                 |              |                  |                        |                    |                           |                         |  |
| U.S.A                      | 9            | 1.03 (0.91-1.17) | 0.07                   | 42.2               | 0.77                      | 0.53                    |  |
| Europe/Australia           | 4            | 0.94 (0.78-1.14) | 0.91                   | 0.0                | 0.20                      | 0.46                    |  |
| Asia                       | 4            | 1.01 (0.83-1.23) | 0.04                   | 51.9               | 0.83                      | 0.39                    |  |
| <b>SFA</b>                 |              |                  |                        |                    |                           |                         |  |
| U.S.A                      | 7            | 1.00 (0.83-1.21) | 0.25                   | 22.2               | 0.99                      | 0.90                    |  |
| Europe/Australia           | 7            | 1.00 (0.87-1.15) | 0.66                   | 0.0                | 0.56                      | 0.39                    |  |
| Asia                       | 4            | 0.96 (0.82-1.12) | 0.22                   | 25.8               | 0.47                      | 0.71                    |  |
| <b>MUFA</b>                |              |                  |                        |                    |                           |                         |  |
| U.S.A                      | 5            | 1.06 (0.81-1.39) | 0.06                   | 52.8               | 0.02                      | 0.02                    |  |
| Europe/Australia           | 5            | 1.08 (0.89-1.29) | 0.33                   | 13.3               | 0.46                      | 1.0                     |  |
| Asia                       | 4            | 1.01 (0.87-1.17) | 0.23                   | 25.4               | 0.37                      | 0.27                    |  |
| <b>PUFA</b>                |              |                  |                        |                    |                           |                         |  |
| U.S.A                      | 1            | 0.74 (0.49-1.12) | 0.43                   | -                  |                           |                         |  |
| Europe/Australia           | 5            | 1.16 (0.98-1.36) | 0.22                   | 0.0                | 0.58                      | 0.45                    |  |
| Asia                       | 4            | 1.00 (0.86-1.18) | 0.18                   | 26.0               | 0.33                      | 0.54                    |  |
| <b>Total n-6PUFA</b>       |              |                  |                        |                    |                           |                         |  |
| U.S.A                      | 5            | 1.01 (0.85-1.20) | 0.03                   | 59.9               | 0.39                      | 0.45                    |  |
| Europe/Australia           | 4            | 1.17 (0.94-1.45) | 0.16                   | 41.7               | 0.82                      | 1.0                     |  |
| Asia                       | 4            | 0.98 (0.87-1.10) | 0.82                   | 0.0                | 0.04                      | 1.0                     |  |
| <b>Total n-3PUFA</b>       |              |                  |                        |                    |                           |                         |  |
| U.S.A                      | 5            | 0.92 (0.77-1.11) | 0.04                   | 57.7               | 0.82                      | 1.0                     |  |
| Europe/Australia           | 4            | 1.11 (0.88-1.40) | 0.12                   | 48.5               | 0.50                      | 0.73                    |  |
| Asia                       | 4            | 1.02 (0.90-1.15) | 0.58                   | 0.0                | 0.67                      | 0.37                    |  |
| <b>n-3HUFA</b>             |              |                  |                        |                    |                           |                         |  |
| U.S.A                      | 2            | 1.04 (0.92-1.17) | 0.89                   | 0.0                | -                         | 1.0                     |  |
| Europe/Australia           | 1            | 0.86 (0.78-1.10) | -                      | -                  |                           |                         |  |
| Asia                       | 3            | 0.94 (0.87-1.01) | 0.68                   | 0.0                | 0.81                      | 0.13                    |  |
| <b>Marine-derived PUFA</b> |              |                  |                        |                    |                           |                         |  |
| U.S.A                      | 3            | 0.96 (0.86-1.08) | 0.92                   | 0.0                | 0.43                      | 0.31                    |  |
| Europe/Australia           | 1            | 1.20 (0.78-1.85) | -                      | -                  | -                         | -                       |  |
| Asia                       | 3            | 1.10 (0.91-1.33) | 0.07                   | 49.5               | 0.58                      | 0.76                    |  |
| <b>Type of fatty acids</b> |              |                  |                        |                    |                           |                         |  |
| <b>LA (C18:2)</b>          |              |                  |                        |                    |                           |                         |  |
| U.S.A                      | 3            | 1.00 (0.71-1.43) | 0.21                   | 36.7               | 0.70                      | 1.0                     |  |
| Europe/Australia           | 5            | 1.25 (1.09-1.45) | 0.72                   | 0.0                | 0.70                      | 1.0                     |  |
| Asia                       | 2            | 1.19 (0.97-1.46) | 0.98                   | 0.0                | -                         | 1.0                     |  |
| <b>AA (C20:4)</b>          |              |                  |                        |                    |                           |                         |  |
| U.S.A                      | 1            | 0.90 (0.59-1.37) | -                      | -                  | -                         | -                       |  |
| Europe/Australia           | 2            | 0.93 (0.66-1.31) | 0.14                   | 54.3               | -                         | 1.0                     |  |



|                  |   |                  |      |      |      |      |
|------------------|---|------------------|------|------|------|------|
| Asia             | 2 | 0.90 (0.75-1.08) | 0.76 | 0.0  | -    | 1.0  |
| ALA (C18:3)      |   |                  |      |      |      |      |
| U.S.A            | 3 | 1.02 (0.85-1.23) | 0.09 | 54.4 | 0.73 | 0.73 |
| Europe/Australia | 5 | 1.07 (0.94-1.23) | 0.73 | 0.0  | 0.63 | 0.71 |
| Asia             | 3 | 1.06 (0.90-1.25) | 0.87 | 0.0  | 0.32 | 1.0  |
| EPA (C20:5)      |   |                  |      |      |      |      |
| U.S.A            | 2 | 0.87 (0.68-1.12) | 0.61 | 0.0  | -    | 1.0  |
| Europe/Australia | 4 | 0.91 (0.81-1.01) | 0.32 | 13.7 | 0.14 | 0.31 |
| Asia             | 2 | 0.85 (0.69-1.04) | 0.35 | 10.5 | 0.38 | 0.46 |
| DHA (C22:6)      |   |                  |      |      |      |      |
| U.S.A            | 2 | 0.93 (0.73-1.20) | 0.37 | 0.0  | -    | 1.0  |
| Europe/Australia | 4 | 0.89 (0.81-0.97) | 0.71 | 0.0  | 0.22 | 0.09 |
| Asia             | 2 | 0.89 (0.71-1.11) | 0.31 | 16.0 | 0.91 | 0.46 |
| DPA (C22:5)      |   |                  |      |      |      |      |
| U.S.A            | 0 |                  |      |      |      |      |
| Europe/Australia | 3 | 0.85 (0.78-0.94) | 0.43 | 0.0  | 0.01 | 0.30 |
| Asia             | 2 | 0.94 (0.73-1.21) | 0.24 | 27.7 | 0.94 | 0.81 |

<sup>a</sup>: *p* value for heterogeneity

<sup>b</sup>: *p* of Egger, *p* value of Egger rank correlation method for testing publication bias

<sup>c</sup>: *p* of Begg, *p* value of Begg rank correlation method for testing publication bias

Total fatty acids (TFA): SFA + MUFA + PUFA; Total *n*-6 PUFA: LA + AA; Total *n*-3 PUFA: EPA + DHA + ALA + DPA or EPA + DHA + ALA; *n*-3 HUFA: EPA + DHA + DPA; Marine-derived PUFA: EPA + DHA.

## Supplementary Figures

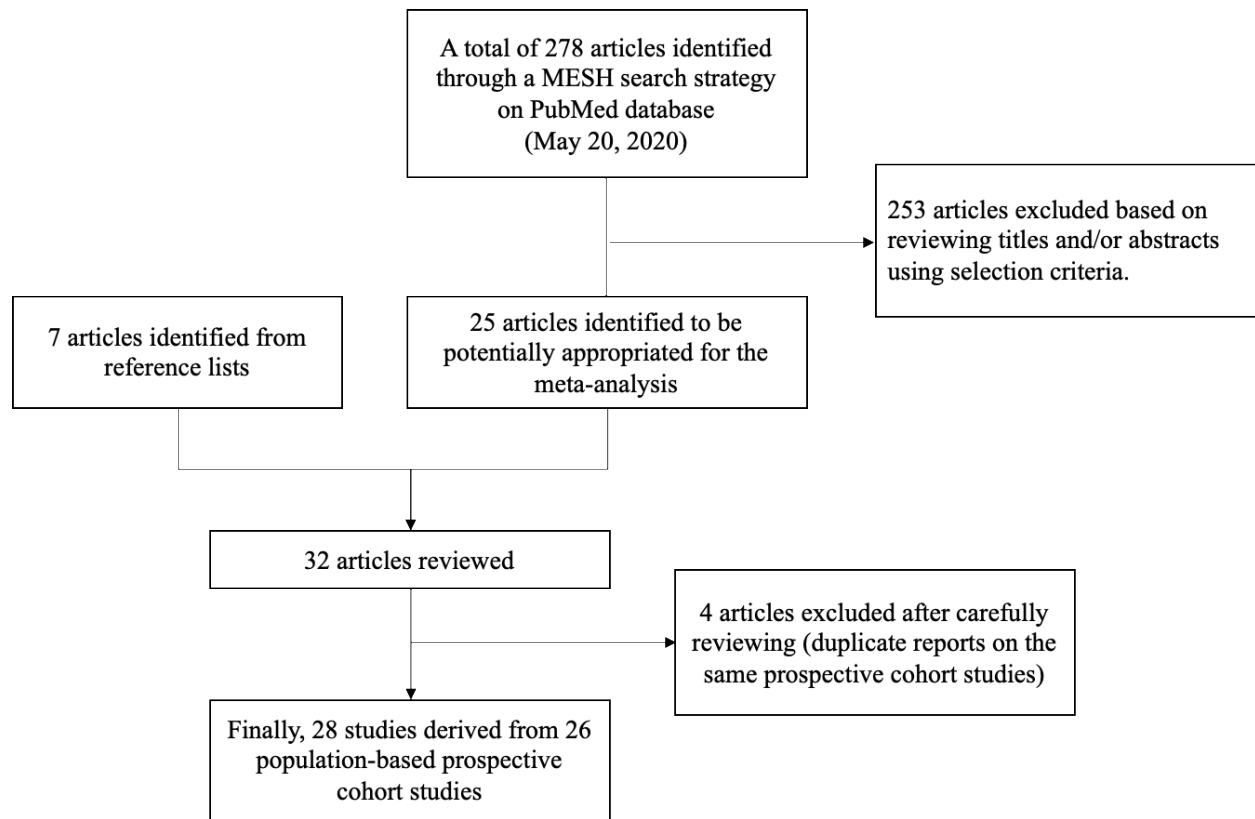

*Supplementary Figure 1:* Selection of studies for meta-analysis

### n3 polyunsaturated fatty acid (n-3 PUFA) intake

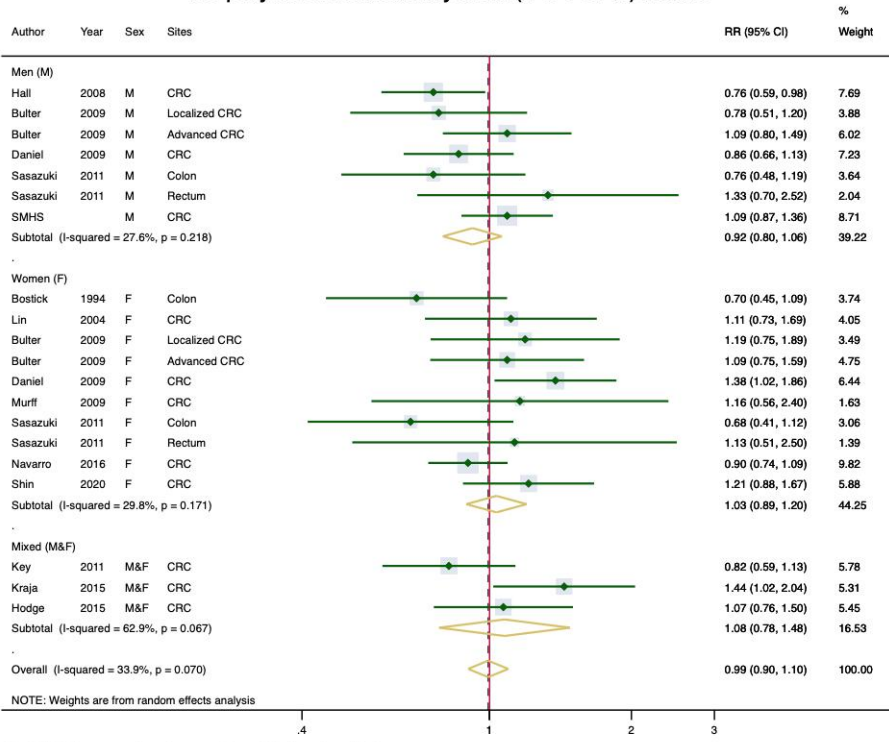

Mixed (M&F): These prospective studies reported the result including males and females.

### n6 polyunsaturated fatty acid (n-6 PUFA) intake

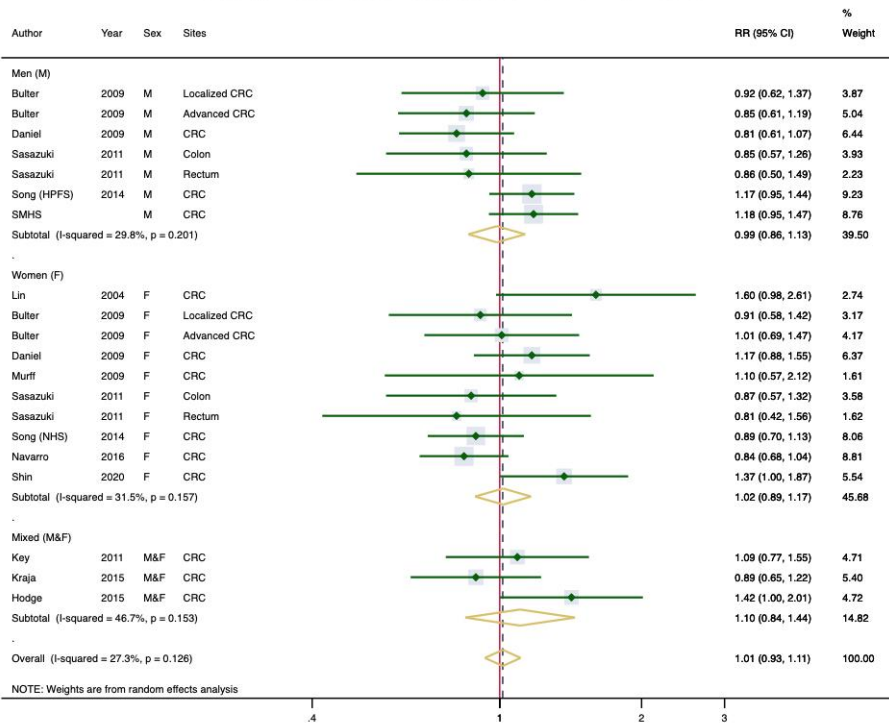

Mixed (M&F): These prospective studies reported the result including males and females.

**Supplementary Figure 2:** Meta-analysis of n-3 PUFA and n-6 PUFA intake and risk of CRC
